# Supplementary material for: Development and external validation of a multivariate model for predicting pneumonia in patients receiving maintenance hemodialysis: a retrospective study
Source: PeerJ. 2025 Oct 9;13:e20070. doi: 10.7717/peerj.20070 (PMC12515429; doi:10.7717/peerj.20070)
Supplement: Supplemental Information 1 [file peerj-13-20070-s001.xlsx]

## Sheet: Sheet1
center	time	Y	Sex	SmokingorDrinking	Hemodialysis vascular access	Dialysis frequency	Duration of dialysis	Cerebralapoplexy	Hypertension	Diabetes	CHD	NYHA	Metabolicacidosis	Pulmonaryarteryhypertension	Serouseffusio	Historyoffracturesurgery	Age	BMI	Pulse	SBP	DBP	URR	UFR	WBC	NEU_	LYM_	HGB	CRP	A_G	Scr	Ca	P	PTH	TC	PHR	LVMI	lnPRO_BNP	LVEF	supplementary variable	→	Kt_V	Reasons for entering dialysis	Antihypertensive drugs	Antidiabetic drugs	Calcium tablets or Vitamin D
0	46	0	1	0	1	3	4	0	3	0	1	1	0	1	0	0	74	23.486	66	200	87	66.76	10.687	4.69	61.8	24.4	95	0.72	1.55	367	2.05	1.1	241.5	6.47	115.2	123.046	8.06589	44			1.32	2	1	0	1
0	50	1	1	0	2	3	4	0	1	1	1	1	0	0	0	1	80	20.479	88	145	75	68.19	9.08304	11.38	68.9	19.1	92	58.83	0.75	493	1.87	3.28	94.5	3.98	97.931	125.014	10.4631	40			1.44	4	0	0	1
0	65	0	0	0	1	3	3.5	0	0	0	0	0	0	0	0	0	30	17.449	74	97	58	75.85	21.721	7.51	87.2	6.4	70	1.58	1.4	500	1.37	1.73	896.8	2.38	151.579	113.358	8.32845	65.7			1.8	4	0	0	1
0	9	0	1	0	1	3	4	1	3	1	0	0	1	0	0	0	44	31.3912	110	97	57	68.19	7.95455	11.81	72.7	19.6	119	2.23	1.54	496	1.91	1.44	328.9	4.48	159.639	131.692	8.24536	42			1.44	1	0	1	1
0	11	0	0	0	1	3	3.5	0	0	0	0	0	0	0	0	0	46	18.7022	95	135	71	68.19	12.0749	6.84	66.7	24.1	89	25.14	1.03	546	2	1.31	278.7	4.537	114.812	128.941	8.19629	66.9			1.44	1	0	1	1
0	23	1	1	1	1	3	4	0	0	1	1	0	0	0	0	0	67	25.8984	67	149	74	73.34	12.4434	7.2	73	16.3	124	11.91	1.67	670	1.71	1.63	454.79	4.75	103.333	96.1426	7.67601	65			1.54	1	0	1	1
0	14	1	1	1	2	3	4	1	3	1	1	1	0	0	1	0	79	19.8047	78	167	72	69.31	4.93097	4.67	68.1	21.5	145	24.44	1.79	340	2.14	1.49	278.2	2.39	160.417	83.826	7.90101	63			1.39	4	1	0	1
0	61	0	1	0	1	3	4	0	0	1	0	1	0	0	0	0	57	24.0653	90	156	74	59.36	14.5862	3.76	62	25.1	56	1.1	1.3	1094	1.87	1.82	1361.91	3.655	60.4082	136.921	9.356	76			1.08	1	1	1	1
0	54	0	1	0	1	3	4	0	3	0	0	0	0	0	0	0	80	21.4453	83	156	87	70.27	11.8397	6.76	78.8	9.2	114	55.46	1.17	446	1.93	1.46	199.4	4.03	122.4	75.2855	10.4631	75			1.47	2	1	0	1
0	46	0	0	0	1	3	4	0	0	0	0	0	0	0	0	0	37	25.717	77	173	116	68.27	10.514	6.42	66	20	77	1.96	1.68	983	1.09	2.39	370.6	3.92	210.714	119.962	8.61617	63.8			1.37	2	1	0	1
0	12	0	0	0	2	2	3.5	0	3	1	0	1	0	0	0	0	45	18.3143	87	143	81	69.97	15.5844	4.46	79.5	10.7	96	0.92	1.73	232	2.02	1.29	86.89	3.978	202.805	113.009	8.94259	61.2			1.46	1	0	1	1
0	5	1	0	0	1	2	4	0	0	0	0	0	0	0	0	0	30	18.2262	84	138	69	70.57	14.8352	3.89	62.3	24	60	0	1.63	661	1.21	2.67	15.42	4.491	69.3493	127.286	10.4631	47			1.51	2	1	0	1
0	63	0	1	1	1	3	4	0	3	1	0	1	0	0	0	0	47	21.4533	90	160	70	67.24	12.9032	8.21	70.5	18	84	3.12	1.36	401	2.02	1.53	292.1	12	73.8095	108.572	7.14441	64			1.37	4	1	0	1
0	31	0	1	1	1	3	4	0	0	0	0	0	0	0	0	0	40	24.3265	90	95	77	69.47	6.71141	4.26	78.1	15.7	79	80.23	1.41	406	1.88	3.56	57.91	2.61	227.941	79.637	5.99943	74			1.38	4	0	0	1
0	22	0	1	0	2	3	3	1	3	0	0	0	0	0	0	0	88	20.4082	80	134	68	68.71	13.0854	8.12	84	8.8	84	15.15	1.28	182	1.95	0.98	177.1	3.684	56.6426	114.471	7.03966	61			1.39	4	0	0	1
0	45	0	1	0	1	3	4	0	0	1	0	0	0	0	0	0	38	25.7117	86	127	84	67.56	5	6	73.1	10.6	67	43.76	1.54	1015	1.89	1.93	536.9	2.79	310.938	95.1372	9.28647	59			1.29	2	1	0	1
0	22	0	1	0	2	3	4	0	3	1	0	0	0	0	1	0	55	19.3772	84	140	76	68.19	9.375	4.88	78.9	11.1	53	165.05	1.23	320	1.7	0.99	193.63	6.29	116.883	151.419	7.35503	65			1.44	1	0	1	1
0	46	1	0	0	2	3	4	0	3	0	1	1	0	0	0	0	78	21.121	75	131	75	74.56	7.29572	6.2	64	25.1	75	10.12	0.95	692	2.22	2.09	103.96	3.53	225.882	122.974	9.754	63.1			1.6	2	1	0	1
0	76	0	0	0	1	3	4	0	0	0	0	1	0	0	0	0	42	17.7315	79	125	81	82.11	11.7371	2.46	62.3	27.4	82	0.01	1.59	547	2.16	1.65	268.6	3.67	42.9752	75.2242	8.83464	59			2.07	4	0	0	1
0	11	0	0	0	2	3	4	1	3	1	0	1	0	1	0	0	73	19.4771	74	160	73	79.49	13.8889	7.02	64.4	25.2	83	4.41	1.26	340	1.9	0.77	132.94	4	105.036	106.753	6.95514	66			1.91	1	1	1	1
0	11	0	1	1	1	3	4	0	3	0	0	0	0	0	0	0	49	34.56	100	131	67	93.23	6.621	8.85	77.5	15.7	114	135.59	1.61	723	2.0289	1.2268	783.72	2.61	356.364	106.05	4.65396	65.6			3.33	4	0	0	1
0	16	0	0	0	2	3	4	0	1	0	0	0	0	0	0	0	68	18.6667	78	146	74	74.88	2.38095	3.86	58.8	32.3	71	0.72	1.96	584	1.95	1.78	380.14	3.93	48.5714	78.5168	8.43076	71			1.68	4	0	0	1
0	30	1	1	0	1	3	4	0	3	1	0	1	0	0	0	0	74	14.4531	79	142	72	76.37	9.45946	4.28	74.9	11	56	7.78	1.56	796	1.86	1.46	344.9	4.26	66.4234	194.015	10.1985	56			1.62	3	0	0	1
0	13	0	1	1	2	3	4	0	3	0	0	0	0	0	0	0	50	21.3672	83	151	92	65.16	8.68373	7.21	69.8	21.6	101	1.17	1.57	575	2.14	1.82	259.41	4.87	169.231	125.34	8.79633	64.7			1.15	2	1	0	1
0	7	0	0	0	1	3	4	0	0	0	0	0	0	0	0	0	58	21.6441	69	129	77	68.19	10.0962	4.15	62.3	28.3	86	0.09	1.5	957	2.31	2.79	65.39	5.22	108.163	102.665	7.70865	67			1.44	2	1	0	0
0	16	0	1	1	2	3	4	1	3	0	0	0	0	0	0	0	59	20.7612	85	132	96	77.4	12.5	13.74	90.3	3.8	124	0.92	1.51	684	1.97	2.13	206	6.96	17.5214	104.981	6.16777	66			1.8	2	1	0	1
0	6	1	0	0	1	3	4	0	0	0	0	0	0	0	0	0	36	18.7305	85	118	80	86.14	13.3333	7.23	77.6	13.1	51	32.42	1.07	934	1.57	2.66	17.75	2.74	41.0256	87.5735	8.30968	64			2.43	2	1	0	1
0	26	0	1	0	1	3	4	0	0	0	0	0	0	0	1	0	54	20.5078	45	142	63	67.23	13.8095	5.11	71.6	18.8	73	9	1.65	344	2.01	1.47	303.3	3.11	106.061	153.942	9.0676	70			1.36	2	1	0	1
0	42	1	0	0	2	3	4	0	0	1	0	1	0	0	0	0	78	20.9778	68	132	75	84.92	5.29661	7.7	68.4	20	72	8.55	1.8	370	2.87	2.36	254.56	3.45	174.766	112.827	9.11797	64			2.2	4	0	0	1
0	60	0	1	0	1	3	4	1	3	1	0	0	0	0	0	0	55	26.9896	78	170	78	58.26	9.9359	8.07	71.1	17.2	104	2.6	1.48	439	2.1	1.47	239.06	3.9	119.863	139.631	8.02748	61			1.05	1	1	1	1
0	24	0	1	1	2	3	4	0	3	1	0	0	0	0	0	0	49	22.4609	87	99	71	66.41	13.0435	7.55	70.5	21.4	67	10.01	1.14	690	1.85	1.64	363.42	7.61	179.195	115.547	7.30344	68			1.33	4	0	0	1
0	36	1	1	1	1	3	4	0	3	1	0	1	0	0	0	0	67	28.3391	67	144	86	60.76	10.6838	7.25	72.9	9.2	70	14.85	1.54	711	1.73	2.25	399.3	4.14	173	203.304	8.62748	60			1.13	1	0	1	1
0	52	0	0	0	1	3	4	0	3	0	0	0	0	1	0	0	51	23.6328	77	140	94	71.48	10.3306	4.06	43.7	45.8	102	1.81	1.6	874	2.41	2.48	22.52	4.34	130.172	107.545	6.61218	66			1.5	4	0	0	0
0	35	0	1	1	1	3	4	1	3	0	0	1	0	0	0	0	67	26.8871	61	159	82	58.37	3.75683	8.63	71.6	13.3	92	43.88	1.27	352	2.26	1.03	27.34	8.58	120	109.09	6.13361	63			0.99	4	1	0	0
0	28	0	1	1	1	3	4	0	3	0	0	1	0	0	0	0	67	23.4375	96	150	84	71.8	6.25	6.3	60.5	19.2	71	10.66	1.52	580	2.87	2.43	275.44	4.26	109.375	94.1481	7.40646	57			1.64	4	0	0	1
0	6	1	0	0	2	3	4	0	0	1	0	0	0	0	0	0	58	47.7333	86	140	86	72.43	4.65549	6.25	78.8	12.3	54	6.84	1.23	187	2.13	0.94	18.95	3.13	122.047	92.3605	10.0905	62			1.48	1	0	1	1
0	13	1	1	1	2	3	3	0	3	1	0	1	0	0	1	0	78	24.9609	86	202	96	70.67	11.1782	6.45	61.9	30.3	89	7.95	0.95	281	1.83	0.91	188.11	4.32	173.171	104.155	7.80903	52			1.43	1	1	1	1
0	51	0	1	0	1	3	4	0	0	0	0	1	0	0	0	0	56	20.157	83	109	65	70.28	10.8696	6.02	83.9	6.3	57	11.5	1.59	1180	1.92	3.07	261.3	2.85	269.231	129.132	7.62852	52			1.46	4	0	0	1
0	18	0	1	1	1	3	4	0	0	1	0	1	0	0	0	0	57	20.3856	116	146	78	62.32	23.3645	9.42	73.8	12.9	87	53.6	1.21	416	1.76	1.25	356.01	6.13	101.036	131.713	7.0582	53			1.33	1	0	1	1
0	68	0	1	0	1	3	4	0	0	0	0	0	0	0	0	0	45	30.8642	72	162	110	95.67	10.4938	6.25	58.9	29.1	94	5.59	1.81	1337	1.83	3.23	444.88	4.78	75.0206	82.9484	8.24935	67			4.64	2	1	0	1
0	6	1	0	0	2	3	4	0	3	1	0	0	0	0	1	0	64	23.7669	88	218	119	65.93	15.7618	4.22	51	33.8	72	10.03	1.41	281	1.98	1.34	73.38	5.35	74.5	94.857	7.82222	60			1.36	1	1	1	1
0	64	0	1	0	2	3	4	0	3	0	1	1	0	0	0	0	78	20.9781	80	164	51	68.96	9.4246	4.07	75.7	12.3	82	4.4	1.45	732	2.09	2.06	295.1	3.53	70.6294	124.765	8.34901	66.9			1.38	4	1	0	1
0	5	0	0	0	2	3	4	0	3	0	0	0	1	0	0	0	42	21.1505	103	164	108	68.19	9.94318	7.3	78.2	11.6	63	0.43	1.5	900	1.95	1.57	450.69	4.82	92.6606	112.308	9.36499	60.6			1.44	2	1	0	1
0	23	1	1	0	1	3	4	0	0	0	0	0	0	0	0	0	52	29.7578	89	133	80	61.21	2.90698	8.49	60	26.5	102	0.94	1.38	504	1.96	1.17	494.31	5.35	160.396	78.072	8.88202	70			1.06	4	0	0	1
0	19	0	1	0	2	3	4	0	3	1	0	0	0	0	0	0	69	22.8374	94	148	104	81.69	4.92424	4.74	55.3	29.1	82	2.78	1.32	693	1.91	1.97	365.77	3.9	90.099	96.2226	5.96589	61			1.96	1	0	1	1
0	12	0	1	1	1	3	4	0	0	0	0	1	0	0	0	0	79	22.2633	63	154	78	69.02	5.37634	5.91	63	22.7	85	4.25	1.17	351	1.9	0.94	187.96	4.17	104.237	113.945	7.92497	61			1.34	1	1	1	1
0	24	0	0	0	2	3	4	0	0	1	0	1	0	0	1	0	25	20.6452	86	156	100	64.27	17.1371	9.69	83.9	7.9	64	4.67	1.43	670	1.93	1.19	71.81	5.72	169.154	122.927	6.00376	68			1.31	4	1	0	1
0	15	0	1	0	1	3	4	0	1	0	0	0	0	0	0	0	49	24.2215	99	142	93	63.94	8.57143	8.64	79.8	11.2	95	1.09	1.61	671	2.2	1.44	79.07	3.61	192.381	103.448	6.9787	64			1.1	2	1	0	1
0	37	0	1	0	2	3	4	1	0	1	0	1	0	0	0	0	51	19.0657	76	126	91	70.11	5.44465	5.34	59.4	27.8	76	1.74	1.41	477	1.7	1.1	86.1	3	282.192	97.4486	10.4631	57			1.38	1	0	1	1
0	84	0	1	1	1	3	4	1	3	0	0	0	0	0	0	0	36	21.2585	106	119	97	68.6	6.25	6.38	74	15.9	119	16.55	1.74	1027	1.87	2.49	569.9	2.82	148.598	116.083	9.54847	64.1			1.31	4	0	0	1
0	4	1	1	0	1	3	4	0	0	1	0	0	0	0	0	0	51	22.4609	82	156	71	71.54	13.0435	6.77	73.8	12.2	74	3.57	1.77	992	1.76	2.05	674.32	2.72	84.2593	161.154	9.71137	58			1.53	4	1	0	1
0	79	0	0	0	1	3	4	0	3	0	0	0	0	0	0	0	46	20.4444	80	160	100	68.52	11.413	2.3	76.8	13.1	73	2.11	1.48	1531	1.56	2.36	14.6	4.08	31.8519	117.98	9.04376	58.4			1.22	4	1	0	1
0	21	0	1	0	1	3	4	0	3	1	0	1	1	0	0	0	65	22.0386	98	120	85	67.54	8.33333	5.94	62.8	22.2	76	1.95	1.64	818	1.63	2.16	549.22	4.55	86.5922	98.1364	5.90977	66.2			1.29	4	0	0	1
0	4	0	1	0	2	3	4	1	3	0	0	1	0	1	1	0	74	19.1406	59	134	82	68.19	10.7143	11.03	85.2	8.6	90	5.32	1.1	235	1.79	1.09	182.79	4.6	145.652	91.2222	6.05498	68			1.44	2	1	0	1
0	42	0	1	1	1	3	4	1	0	1	0	0	0	0	1	0	66	29.4531	75	165	81	69.35	3.31565	3.97	71.7	13.6	61	126.03	1.19	664	1.7	2.45	482.7	5.4	56.25	162.519	9.09482	66			1.32	1	1	1	1
0	25	1	1	1	2	2	4	0	3	0	0	0	0	0	0	0	63	22.7666	71	124	66	66.69	9.98099	4.32	72.3	15.8	90	0.36	1.99	310	1.99	1.21	281.8	3.35	71.3043	139.211	9.00626	69			1.27	4	0	0	1
0	77	0	1	1	1	3	4	0	0	1	0	0	0	0	0	0	54	24.8443	90	134	80	69.25	4.87465	10.41	84.2	9.3	109	59.8	1.5	1218	2.52	1.45	118.4	4.227	180.926	108.068	7.37933	66.8			1.39	1	0	1	0
0	5	1	1	1	2	3	4	1	3	1	1	0	0	0	1	0	58	17.8145	87	191	107	80.57	23.1959	9.17	81.9	12.5	106	0.13	1.58	165	1.82	1.13	13.78	3.51	199.39	140.42	4.65396	63			1.97	1	1	1	1
0	10	0	0	0	2	3	4	0	0	0	0	1	0	0	1	0	48	20.4726	93	161	104	68.19	11.0994	3.76	49	36.7	75	15.69	1.21	591	2.02	1.34	111.44	3.55	72.043	124.635	7.96009	50			1.44	4	1	0	1
0	58	0	0	0	1	2	4	0	0	0	0	0	1	0	0	0	56	28.5986	82	117	86	71.86	8.99032	8.52	90	5.3	61	11.74	1.19	565	1.6	1.85	754.6	3.09	222.857	98.7077	8.43533	72			1.5	4	0	0	1
0	19	0	1	1	2	3	4	0	3	1	0	0	0	0	0	0	59	22.0718	98	184	99	73.54	14.5191	7.33	72.5	19	66	0.94	1.41	600	2.07	1.02	580.79	4.7	135.583	76.1065	5.40133	74			1.58	1	1	1	1
0	21	0	0	0	2	3	4	0	3	0	0	0	0	0	0	0	61	25.4688	70	111	74	73	2.30061	3.91	67.1	17.6	81	20.14	1.66	763	1.91	0.99	230.06	6.15	72.9084	108.757	6.72571	67			1.56	4	0	0	1
0	10	0	1	0	2	3	4	0	3	1	0	1	0	0	0	0	54	21.4844	71	127	71	68.23	7.27273	6.05	79.6	13.5	82	71.91	1.22	493	2.07	1.02	193.91	3.7	89.4309	101.56	9.94692	66			1.31	4	0	0	1
0	81	0	0	0	2	3	4	0	0	0	0	1	0	0	0	0	28	17.4638	100	159	68	80.17	18.2353	5.38	55.1	36.3	126	19.56	1.31	359	2.2	0.48	127.5	4.123	182.371	129.847	9.53655	61.4			2.03	4	1	0	1
0	43	0	1	0	2	2	3	1	0	0	0	0	0	0	0	0	83	23.4959	103	142	73	63.15	14.0292	8.2	87.7	3.1	90	165.34	1.56	302	1.82	0.89	391.6	3.8	108.333	112.879	10.0526	58			1.1	4	0	0	1
0	16	1	0	0	2	3	4	0	3	0	0	1	1	0	0	0	71	25.9173	98	131	73	68	7.72798	7.08	81.7	9.9	61	48.36	1.89	483	1.93	1.15	129.29	5.33	214.13	126.566	6.39232	71			1.46	2	1	0	1
0	21	1	1	0	1	2	4	1	3	1	1	0	0	0	0	0	72	28.7197	88	135	77	66.7	7.53012	7.65	78.3	12.2	110	2.8	1.52	468	2.21	1.54	68.3	3.77	150	195.524	6.90975	57			1.29	4	0	0	1
0	68	0	1	1	1	3	4	0	0	0	0	1	0	0	1	0	40	17.9989	78	123	78	75.01	4.92126	5.67	67.5	18.3	76	3.93	1.76	594	1.57	1.38	288.53	3.35	201.389	112.944	10.4631	60			1.71	4	0	0	1
0	27	0	0	0	1	3	4	0	3	1	0	1	0	1	1	0	51	19.7168	89	145	79	76.16	7.20165	3.86	74.7	11.7	61	1.24	1.34	361	2.08	1.62	151.44	3.15	77.0492	112.45	10.4819	62			1.68	4	0	0	1
0	34	1	0	0	2	3	4	1	3	0	0	0	0	0	0	0	67	25.1039	84	174	94	77.99	6.46552	4.05	67.5	19.3	69	0.58	1.29	726	1.94	1.37	300.16	4.56	70.0565	167.655	8.25894	68			1.74	4	1	0	1
0	71	0	0	0	2	3	4	0	0	0	0	1	0	0	0	0	30	21.2279	74	87	55	72	10.7843	2.89	54.1	29	76	7.45	1	603	1.36	2.35	329.8	4.64	90.4762	145.78	10.4631	29			1.42	4	0	0	1
0	59	0	0	0	2	2	4	0	3	1	0	1	0	0	0	0	60	24.7076	66	157	84	83	4.21159	2.89	54.1	29	76	7.45	1	603	1.36	2.35	329.8	4.64	90.4762	130.585	10.4631	66			1.78	2	1	0	1
0	28	1	1	0	1	3	4	0	3	1	0	1	0	0	0	0	54	27.143	80	145	75	69	7.26744	3.19	56.1	27.8	137	0.93	1.73	486	1.93	1.5	209.62	2.56	92.5373	99.9934	7.60639	67			1.52	1	0	1	1
0	67	0	1	1	1	3	4	0	3	0	0	1	0	0	0	0	56	20.5536	78	163	92	68.19	8.83838	9.93	59.4	8.5	115	10.53	1.81	949	1.79	1.15	416.12	4.426	100	115.635	10.0137	57			1.44	4	1	0	1
0	17	0	1	1	1	3	4	0	0	1	0	0	0	0	0	0	62	22.6049	65	157	95	85.37	5.87774	4.44	61.8	25.6	107	0.51	1.56	899	2.13	1.08	337	3.53	119.802	137.041	9.17333	65.5			2.08	1	1	1	1
0	16	0	0	0	2	2	4	0	3	0	0	1	0	0	0	0	70	25.802	97	149	50	74.72	4.96689	4.29	80.7	11.3	88	3.39	2.19	927	1.81	1.58	477.58	3.705	101.317	106.8	6.25859	68			1.52	4	0	0	1
0	41	0	0	0	1	3	4	0	0	0	0	0	0	0	0	0	62	20.4444	88	136	88	77.58	5.43478	5.78	67	21.4	87	2.62	1.76	555	2.1	1.9	165.1	5.67	96.9136	88.7524	7.26423	68			1.72	2	1	0	1
0	34	0	1	0	1	3	4	0	3	0	0	0	0	0	0	0	39	20.1348	78	162	95	70.18	7.65306	3.55	55.6	28.2	82	3.04	1.49	571	1.97	1.52	21.77	3.882	181.723	112.538	8.02162	65			1.45	4	1	0	1
0	49	0	1	1	2	3	4	0	3	1	1	1	0	0	0	0	54	25.1532	68	168	90	69.17	12.0968	6.04	67.2	22.7	99	0.22	1.51	427	1.93	1.23	445.6	4.278	246.729	110.816	6.58258	65.3			1.42	1	1	1	1
0	60	1	1	0	1	2	4	0	3	0	0	1	0	0	0	0	67	26.2188	72	135	74	70.05	10.1351	4.96	75.5	13.6	72	47.68	1.82	619	1.96	2.59	441.5	2.51	58.4158	122.579	7.62462	59			1.43	4	0	0	1
0	12	0	1	0	1	2	4	0	0	1	0	0	0	0	1	0	58	21.9723	77	161	95	61.29	19.685	3.01	74.8	16.1	81	0.39	2.24	452	1.82	1.81	210.94	5	66.242	94.6528	7.33004	60			1.24	1	1	1	1
0	20	0	1	1	1	3	4	0	3	0	0	0	1	0	0	0	46	27.0168	80	158	100	75.78	5.84112	7.76	70.4	18.3	58	2.4	1.48	1300	1.84	1.85	321.8	4.27	223.894	117.239	7.73272	64			1.62	4	1	0	1
0	82	0	0	0	2	3	4	0	3	0	0	0	1	0	0	0	51	22.477	74	220	109	71.32	9.14077	7.56	74.5	14.3	123	2.49	1.06	1019	2.03	1.56	10.2	4.48	116.107	135.583	9.7372	59.7			1.68	4	1	0	1
0	13	1	1	0	2	3	4	0	0	1	0	1	0	0	0	0	66	21.0603	108	130	67	71.16	12.1704	7.73	82	9.9	108	43.9	1.64	784	2.25	1.27	671.76	4.16	115.152	167.362	10.4631	55			1.58	4	0	0	1
0	24	0	1	1	1	3	4	0	0	0	0	0	0	0	0	0	51	21.2312	80	130	80	70.27	15.0905	2.88	53.8	24.6	65	14.24	1.55	419	1.92	1.01	384.38	3	103.937	119.325	8.55801	65			1.49	2	1	0	1
0	21	0	0	0	2	3	4	0	0	1	0	0	0	0	1	0	47	18.902	96	174	85	66	15.7609	8.92	87.3	9.4	69	1.34	1.28	845	1.84	2.34	547.9	3.46	307.586	131.005	6.52671	66			1.38	3	1	0	1
0	15	1	1	0	1	3	4	0	3	1	0	1	0	0	0	0	53	24.7069	91	132	77	68	13.1363	10.76	66.9	16.4	91	1.29	1.39	524	2.1	0.89	138.7	3.37	207.692	140.648	8.59804	69			1.36	1	0	1	1
0	35	0	1	1	1	3	4	0	3	0	0	1	0	0	1	0	54	19.3772	90	191	105	61.64	19.6429	6.02	75.8	15	110	15.39	1.21	648	2.09	1.44	43.3	2.71	111.765	177.054	10.281	46			1.36	1	1	1	1
0	80	0	0	0	2	3	4	0	3	1	0	1	0	0	0	0	65	25.9516	76	189	91	65.18	9	5.77	58.4	31.7	89	4.61	1.81	396	1.59	0.72	1061	6.15	147.015	124.274	7.98378	71			1.46	1	1	1	1
0	11	0	1	0	2	3	4	0	3	0	0	1	0	1	0	0	46	16.7493	98	131	73	71.73	13.1579	5.77	58.4	31.7	89	4.61	1.81	396	1.59	0.72	1061	6.15	147.015	128.927	7.98378	65.6			1.48	2	1	0	1
0	13	1	1	0	2	2	4	0	0	1	0	1	0	0	1	0	58	21.2585	115	225	125	72.45	6.66667	8.06	84.1	4.7	89	34.61	1.26	421	1.85	1.36	286.77	3.67	223.913	104.152	8.11629	61			1.51	4	1	0	1
0	39	1	0	0	2	2	3	0	0	0	0	0	0	0	0	0	26	25.9107	106	161	110	68.19	8.82353	2.6	63.1	23.7	56	0.7	1.69	701	2.16	1.22	428.4	3.19	48.2143	147.655	9.20201	68			1.44	4	1	0	1
0	11	0	1	1	1	2	4	0	0	1	0	1	1	0	0	0	60	25.6055	85	135	89	62.99	8.44595	6.13	70.9	16.7	79	1.03	1.83	582	1.74	1.62	382.16	2.89	161.111	119.585	6.38479	66.1			1.12	1	0	1	1
0	51	0	1	1	1	3	4	0	3	0	0	0	0	0	0	0	50	25.6055	82	139	103	44.81	9.7973	4.42	66.9	24.6	106	0.74	1.67	472	1.86	1.18	366.6	4.72	126.087	97.3056	8.94638	62			0.72	2	1	0	1
0	46	0	1	1	1	3	4	0	3	1	1	0	0	0	0	0	62	20.3019	58	173	82	65.94	9.5986	7.9	77.6	12.4	72	0.83	0.98	545	1.75	1.76	236.5	6.75	231.092	110.843	8.25114	74			1.3	1	1	1	1
0	3	0	1	0	2	3	4	0	1	1	0	0	0	0	0	0	56	22.8374	91	182	83	68.19	7.95455	6.8	69.4	21.6	103	23.6185	1.3	272	1.96	1.08	79.84	6.58	121.053	111.672	8.65281	65.9			1.44	1	1	1	1
0	56	0	0	0	1	3	4	0	0	0	0	1	0	0	0	0	49	18.176	65	112	79	79.78	10.7212	4.83	67.7	18.1	80	3.37	1.97	937	2.27	2.02	887.1	3.993	130.159	148.539	9.52646	67			1.91	4	0	0	1
0	69	0	1	0	2	3	4	1	1	1	0	1	0	0	0	0	63	25.5999	89	123	67	61.32	9.22953	6.61	67.2	24.3	85	38.93	1.37	187	1.96	1.22	220.6	3.55	280.263	100.683	7.7424	72			1.12	1	0	1	1
0	33	0	0	0	1	3	4	0	0	0	0	1	0	0	0	0	31	30.1562	90	189	126	69	5.82902	5.75	63.3	25.5	92	3.0493	1.76	528	2.18	1.69	301.11	5.73	144.138	154.597	8.61613	32			1.4	2	1	0	1
0	43	0	0	0	2	2	4	0	3	0	0	1	0	0	0	0	79	20.5477	55	162	76	68	8.31601	6.16	69.2	16	77	68.49	1.7	596	1.74	1.77	338.6	3.26	159.574	114.944	9.59643	56.9			1.42	2	1	0	1
0	36	0	1	0	1	3	4	0	3	1	0	0	0	0	0	0	52	21.7779	83	166	100	63	12.4598	5.78	54.2	35.8	126	2.18	1.92	637	2.26	1.56	380.17	3.29	100	89.2686	7.07118	66			1.17	1	1	1	1
0	34	0	0	0	2	3	4	0	0	0	0	1	0	0	0	0	39	26.9217	87	210	126	72	8.03859	4.81	72.1	21.3	82	0.89	1.48	321	1.71	1.95	542.3	5.48	68.3761	133.889	9.3767	67			1.45	4	1	0	1
0	56	1	1	0	1	3	4	1	3	0	1	1	0	0	0	0	48	23.7024	108	199	95	63	11.3139	7.46	78	13.2	67	18.29	1.68	1442	2.06	1.93	307.7	2.75	67.5214	124.794	8.55353	63			1.18	4	1	0	1
0	13	0	1	1	2	3	3.5	1	3	0	0	1	0	0	1	0	58	20.7031	120	145	68	70.83	14.5553	5.77	91.1	3.7	77	258.04	1.6	600	2.08	0.76	192.18	3.99	90.1961	154.927	8.79954	65			1.49	4	0	0	1
0	74	0	1	0	2	3	4	0	0	1	0	0	0	0	0	0	53	28.8872	105	145	70	46	10.3129	4.36	63.6	23.8	125	11.4	0.94	473	2.26	1.3	199.3	3.2	96.9697	118.098	8.69918	74			0.56	4	0	0	0
0	16	0	0	0	2	3	4	0	3	1	0	1	0	0	0	0	82	19.5312	65	169	90	68	10	4.49	80.8	12	85	5.54	1.37	454	1.68	1.2	336.52	2.84	96.3636	133.943	7.50655	62			1.42	4	1	0	1
0	3	0	1	1	1	3	4	0	3	0	0	1	0	0	0	0	60	21.2585	72	182	104	68.62	9.58333	7.79	81.8	11.7	134	1.8	1.58	659	2.16	1.55	198.76	4.173	147.475	183.453	9.7041	49			1.42	2	1	0	1
0	76	0	1	0	1	3	4	0	0	0	0	0	0	0	0	0	32	26.5338	82	158	89	68.19	7.09459	4.25	58.4	32.9	85	7.87	1.58	615	1.96	1.79	1455.76	3.73	238.298	121.102	7.02389	65.8			1.44	4	1	0	1
0	12	0	0	0	2	3	4	0	0	0	0	0	0	0	0	0	50	19.3333	75	107	79	90.1	9.77011	2.54	81.5	17.6	46	3.72	1.62	788	2.11	2.92	555.81	5.33	58.5714	142.629	8.98993	65.1			2.85	2	1	0	1
0	15	1	0	1	2	3	4	0	0	1	0	0	0	0	0	0	52	15.294	86	120	75	78.32	18.6567	10.71	83	6.8	70	217.94	0.96	462	2.02	0.93	323.8	4.336	167.955	140.61	10.4631	45			1.91	1	0	1	1
0	12	0	1	1	2	3	4	0	3	1	0	1	0	0	1	0	60	24.4745	90	142	70	55.53	8.92857	8.28	87.4	7.2	74	13.57	1.83	1891	2.27	3.11	187.19	6.91	167.742	123.079	10.2693	61			0.97	4	0	0	0
0	83	0	1	0	1	3	4	0	3	0	0	1	0	0	0	0	42	25.4325	73	166	92	67	7.82313	8.52	75.3	16.4	145	5.16	1.39	973	2.44	2.47	426.2	3.36	204.878	125.356	9.42194	61.1			1.42	3	1	0	1
0	48	0	0	0	1	3	4	0	0	0	0	0	0	0	0	0	49	23.5078	71	173	103	61.45	11.3281	5.17	67.9	20.5	81	2.03	1.47	493	2.05	2	202.7	3.39	112.389	89.3711	7.56164	70			1.13	4	1	0	1
0	18	1	1	1	1	3	4	0	3	0	0	0	0	0	0	0	53	23.214	72	139	84	70.2	7.91139	1.74	82.5	11.7	44	1.05	1.24	755	1.46	1.15	325.8	2.74	26.7606	120.53	6.70294	66			1.61	4	0	0	1
0	7	0	0	0	1	3	4	0	0	0	0	1	0	0	1	0	30	18.4807	102	179	123	68.19	11.8243	5.03	83.3	9.6	80	3.69	1.55	1098	1.87	2.72	663.84	3.33	53.0435	117.849	9.3142	52			1.44	2	1	0	1
0	34	0	0	0	1	2	4	0	0	0	0	0	0	0	0	0	53	18.9873	87	159	98	67.9	21.6245	3.7	88	10.7	82	0.76	1.92	439	1.72	2.1	200.2	3.66	94.6309	128.233	9.17091	66			1.52	4	1	0	1
0	82	0	0	0	1	3	4	0	0	0	0	0	0	0	0	0	58	25.1162	109	149	80	66.2	6.77831	7.19	93.1	3.6	109	4.76	1.78	649	2.14	2.42	299.96	4.58	71.875	92.675	6.68599	68			1.43	4	0	0	1
0	57	0	1	0	1	3	4	0	3	0	0	0	0	0	0	0	33	24.9787	71	148	70	65.3	10.2837	5.11	73.9	19	82	1.97	1.62	665	2.2	1.33	281.8	3.19	192.045	114.523	7.24208	57			1.38	4	0	0	1
0	48	1	0	0	1	3	4	1	3	1	1	0	0	0	0	0	57	24.6599	82	118	76	67.6	10.7759	5.24	67.6	21.9	87	9.8	1.2	709	1.8	1.56	352.2	5.28	134.951	121.707	7.62675	69			1.49	2	1	0	1
0	5	0	0	0	2	2	4	0	0	0	0	0	0	0	0	0	71	26.5643	63	162	80	68.19	8.33333	8.59	76.3	16.8	73	10.89	1.57	251	2	1.16	528.44	5.88	66.4596	87.5261	5.91188	72			1.44	2	1	0	1
0	75	0	1	0	1	3	4	0	0	1	0	0	0	0	0	0	55	30.9404	70	149	77	66.1	10.7759	3.07	55.7	36.4	110	2.9	1.55	526	2.32	1.57	131.52	4.681	72.205	79.4454	9.14753	63			1.39	4	0	0	0
0	63	0	1	0	1	3	4	0	0	0	0	0	0	0	0	0	35	25.8645	62	192	114	67.6	13.3562	6.45	84	10.4	71	0.29	1.77	1486	1.96	1.25	112.9	3.2	77.551	125.799	9.14942	60.8			1.47	2	1	0	1
0	16	1	1	0	2	3	4	0	3	1	0	1	0	0	1	0	51	33.3218	97	198	110	68.2	4.9325	7.16	80.9	11.8	86	1.38	1.46	645	1.89	1.59	569.1	3.96	118.705	148.021	9.91319	69			1.45	1	1	1	1
0	67	0	1	0	1	3	4	0	0	0	0	0	0	0	0	0	42	26.782	73	130	80	67.8	12.2739	3.14	74.6	12.7	36	4.31	1.94	1329	1.91	2.86	791.83	2.79	126.506	138.249	7.03825	64.3			1.46	4	0	0	1
0	26	0	1	1	1	3	4	0	3	0	0	1	0	0	0	0	54	19.7924	86	206	126	66.3	8.74126	5.06	62.5	29.7	62	3.46	1.59	788	1.93	1.86	306.95	4.307	39.8698	113.799	11.0414	48			1.41	2	1	0	1
0	30	0	0	0	2	3	4	1	3	0	0	1	0	0	0	0	84	22.3703	74	159	90	67.3	17.3469	5.51	69.7	21.2	95	128.84	1.4	207	2.07	0.8	127.6	3.25	298.02	128.464	7.96137	63			1.52	4	1	0	1
0	42	0	1	1	1	3	4	0	3	0	0	1	0	0	1	0	50	23.3844	100	139	87	65.8	10.9848	3.97	59	23.2	77	3.87	1.24	367	1.86	1.1	464.4	4.07	89.7059	159.402	9.18554	62			1.35	4	0	0	1
0	10	0	1	0	1	3	3	1	3	1	0	1	0	0	0	0	64	21.2585	83	129	96	68.19	11.6667	6.72	52.4	32.4	89	7.5	1.3	368	2.39	1.36	13.11	5.33	209.346	89.5379	5.94803	57			1.44	1	0	1	0
0	49	0	1	0	1	3	4	0	0	0	0	1	0	0	0	0	22	30.1038	94	135	94	68.19	6.03448	6.45	70.9	14.6	75	4.27	1.48	1020	2.13	2.33	729.1	4.09	153.409	128.685	8.91704	64			1.44	2	1	0	1
0	46	0	0	0	1	3	4	0	0	0	0	0	0	0	0	0	41	21.2084	74	130	80	65.8	15.3061	6.06	67.6	24.8	84	1	1.51	586	1.83	1.93	537.3	6.09	127.517	64.6601	6.40985	76			1.39	4	0	0	1
0	16	0	0	0	2	2	4	0	3	0	0	0	0	0	0	0	36	22.6326	120	196	132	65.3	8.84956	14.62	87.3	8.9	74	0.55	1.31	1091	1.33	2.07	786.77	5.13	257.843	127.17	6.99668	65			1.33	2	1	0	1
0	4	1	1	0	1	3	4	0	0	0	0	1	0	0	0	0	24	26.6436	113	174	114	67.9	16.2338	12.64	88.8	7.5	75	123.79	1.69	840	1.97	2.54	122.5	3.463	246.615	170.039	10.4631	58			1.48	4	1	0	1
0	8	1	0	0	1	2	4	0	3	1	1	1	0	0	0	0	78	18.424	93	162	86	67.5	15.3846	4.72	74.6	20.7	82	0.6	1.65	609	2.54	1.5	75.19	3.23	90.5325	81.5529	7.72091	70			1.58	1	1	1	0
0	14	1	1	0	1	3	4	0	0	1	0	1	0	0	0	0	67	28.0404	80	165	80	68.5	8.57143	10.71	65.3	24.6	84	0.82	1.77	442	2.1	1.04	177.9	2.85	190.541	132.016	7.55904	69			1.53	1	1	1	1
0	16	0	0	0	2	3	4	0	3	1	0	1	0	0	0	0	89	24.0346	59	184	72	65.3	5	2.61	85.2	8.1	75	1.13	2.38	483	3	1.3	34.35	3.43	55.4688	94.884	6.17919	72			1.32	1	1	1	0
0	10	0	0	0	1	2	4	0	0	0	0	0	0	0	0	0	38	15.0581	84	146	98	68.19	12.3529	6.64	73.1	17	68	6.9	2.07	929	1.85	2.41	827.88	3.925	164.804	98.1508	8.96722	55			1.44	2	1	0	1
0	47	1	0	0	2	3	4	0	0	0	1	0	0	0	0	0	57	21.0303	103	128	98	68.2	13.8095	3.06	78.1	14.4	114	2.99	1.55	755	2.17	1.52	9.99	5.06	70.8333	66.3452	7.62321	63			1.52	2	1	0	1
0	40	0	1	0	1	2	4	0	3	0	0	1	0	1	0	0	50	22.4766	66	140	88	65.2	8.33333	4.94	70.9	14.4	75	22.64	1.02	478	1.72	0.86	404.8	3.84	111.966	194.089	9.20513	85			1.32	4	0	0	1
0	68	0	0	0	1	3	4	0	0	0	0	0	0	0	1	0	16	16.6016	84	166	97	69.2	12.9412	9.59	79	14.9	55	8.17	1.9	613	2.09	1.42	111.7	5.57	81.2808	129.824	9.23386	68			1.56	2	1	0	1
0	30	0	0	0	2	3	4	0	3	1	1	1	0	0	0	0	63	20.3092	72	174	90	68.6	12.3274	4.47	59.4	28.3	70	0.99	1.56	407	1.97	1.53	111.3	2.48	160.825	129.816	9.34583	68			1.53	1	1	1	1
0	5	0	0	0	1	3	4	0	3	0	0	0	0	0	0	0	51	23.9556	83	147	90	68.19	9.74026	5.34	67.7	24.2	73	0.21	1.56	583	2.01	2.55	953.94	3.948	80.6271	110.612	8.57085	66			1.44	4	0	0	1
0	7	0	0	0	2	3	3.5	0	3	1	0	1	1	0	1	0	80	25.9107	64	150	61	68.19	8.82353	4.38	77.3	14.4	56	2.7	1.16	369	1.91	2.07	279.8	4.24	56.4815	100.825	8.50848	65			1.44	1	0	1	1
0	9	1	0	0	2	3	4	0	0	1	0	1	0	0	0	0	70	20.5457	65	150	90	66.2	8	11.03	93	6.2	97	1.92	1.17	519	2.17	0.97	268.2	4.29	104.965	118.651	8.33902	49			1.42	1	0	1	1
0	3	0	1	0	1	3	4	0	1	0	0	0	0	0	0	0	35	23.4107	82	144	101	68.19	8.44051	4.53	65.5	23	73	0.57	1.0938	764	2	2.01	135.05	2.95	173.611	113.134	8.95149	63.6			1.44	2	1	0	1
0	8	0	1	0	2	3	4	0	3	1	0	1	0	0	0	0	92	18.2823	66	177	84	65.1	8.72093	6.82	67.2	24.9	93	0.42	1.45	248	1.86	1.22	133.54	3.52	33.5821	148.172	7.98686	69			1.32	4	1	0	1
0	7	0	0	0	1	2	4	0	0	0	0	0	0	0	0	0	62	21.0703	109	148	90	57.01	2.37643	6.71	92.2	3.1	111	0.8	1.17	1189	2.22	1.9	204.5	4.726	86.3738	83.9678	6.17981	65			0.93	4	0	0	1
0	9	0	1	0	1	3	4	0	3	1	0	0	0	0	0	0	52	20.5879	69	172	93	68.19	9.59781	8.94	67.1	16.4	76	0.87	1.88	662	1.65	2.01	351.84	4.05	270.732	118.824	6.05256	61			1.44	1	1	1	1
0	35	0	0	0	1	3	4	0	3	0	0	0	1	0	0	0	43	21.2739	78	134	82	74.65	10.0402	5.6	76.3	15.4	77	15.53	1.56	666	1.93	1.55	300.7	4.22	120.588	171.266	9.22128	66			1.63	2	1	0	1
0	7	0	1	0	1	3	4	0	3	0	0	0	0	0	1	0	34	23.2422	96	169	119	69.66	10.9244	7.99	81.8	9.7	104	11.48	2.11	857	1.89	2.52	462.29	3.64	183.333	143.176	9.09324	64			1.44	4	1	0	1
0	24	0	1	0	1	3	4	0	3	0	0	1	0	0	0	0	74	23.2426	96	187	76	68.5	3.04878	3.02	59.8	25.7	95	2.02	1.18	531	2.07	1.67	189.56	2.74	123.711	118.445	7.4749	72			1.62	4	1	0	1
0	12	0	1	0	2	3	4	0	1	1	0	1	0	0	0	0	65	20.4688	98	153	92	59.5	6.20229	5.08	78.6	9.9	66	7.35	1.74	264	1.87	1.05	171.97	5.01	124.113	100.014	8.73905	59			0.88	1	1	1	1
0	63	0	0	0	2	3	4	0	3	0	0	1	0	0	0	0	31	20.3556	98	162	98	79.97	6.55022	6.89	69.2	21.1	61	8.22	0.83	980	1.93	2.61	182.6	3.83	131.858	95.2076	10.4631	46			1.86	2	1	0	1
0	23	0	1	1	1	3	4	0	0	1	0	1	0	0	0	0	62	22.0312	60	120	70	67.2	11.0816	5.03	65.8	21.8	70	5.5	1.67	569	2.01	1.13	357.25	3.526	191.909	142.267	8.94606	52			1.35	1	0	1	1
0	16	1	1	0	1	2	4	0	3	1	1	1	0	0	0	0	76	20.1653	86	182	99	65.9	9.56284	6.01	79.9	11.7	85	1.51	1.66	399	1.91	1.62	288.42	2.7	65.2542	115.697	6.66316	67			1.32	1	1	1	1
0	5	0	0	0	2	3	4	0	0	0	0	0	0	0	0	0	19	17.8326	107	112	69	66.1	4.2735	3.62	66.6	22.7	108	2.4	1.77	897	2.62	1.38	71.42	4.14	296.748	71.4163	8.98404	70			1.45	1	0	1	0
0	9	0	1	1	2	3	4	0	0	0	0	0	0	0	0	0	33	18.5491	99	138	90	65.1	19.3069	9.22	91.9	6.7	88	2.1	0.8834	436	2.32	1	10.2	4.578	128.166	133.657	9.51989	66.5			1.34	2	1	0	0
0	19	1	1	0	1	3	4	0	0	0	0	1	0	0	0	0	62	20.8889	101	175	89	69.43	7.97872	4.03	60.2	18.1	88	11.31	1.36	411	2.08	1.04	129.5	3.74	87.0968	258.757	10.4631	42			1.4	4	1	0	1
0	12	1	1	0	1	3	4	0	0	1	1	1	1	0	0	0	70	23.125	117	158	92	69.87	10.9797	6.81	78.9	9.8	79	93.16	1.15	435	2.18	1.36	286.7	3.33	162.745	112.62	7.76132	60			1.44	1	1	1	1
0	7	0	0	0	2	3	3.5	0	3	0	0	0	0	0	1	0	72	19.5167	58	195	81	66.3	8.34671	7.46	73.9	16.4	116	34.28	1.27	607	2.04	1.58	251.41	4.35	59.4937	84.9691	8.02098	64			1.45	4	1	0	1
0	9	0	1	1	1	3	4	0	1	0	0	0	0	0	0	0	56	20.9778	93	161	91	67.3	12.1822	6.02	78.3	11.5	65	0.9	1.72	503	2.22	1.4	138.42	4.39	58.9189	130.085	9.44796	65.4			1.44	2	1	0	1
0	18	0	1	0	2	3	4	0	3	1	1	0	0	1	0	0	46	26.782	99	145	89	66.3	6.45995	10.12	68.2	18.3	85	18.87	1.77	882	1.62	0.59	110.68	4.4	350	138.652	8.20822	47			1.35	1	0	1	1
0	17	0	0	0	2	3	4	0	1	0	0	0	1	0	0	0	27	22.8545	95	154	108	65.32	2.33645	4.36	51	36	92	3.84	1.52	373	1.86	1.8	179.88	5.49	204.673	127.93	9.5883	62			1.32	2	1	0	1
0	8	0	1	0	1	3	3	0	3	1	0	0	0	0	0	0	58	22.3691	75	156	79	67.2	16.4204	5.47	75.1	10.6	92	0.86	1.7	836	2.15	1.94	168.99	4.43	174.118	109.01	6.68524	66.3			1.59	2	1	0	1
0	35	0	1	0	1	2	4	0	3	0	0	1	0	0	0	0	77	22.7615	92	156	81	78.98	5.9322	6.91	66	12.7	101	0.47	2.24	394	2.3	1.31	233.65	3.04	77.7778	139.211	9.92468	45			1.8	4	1	0	0
0	7	0	0	0	1	3	4	0	0	0	0	0	0	0	0	0	41	24.1797	89	129	92	67.2	13.7318	3.47	77.7	15.6	56	1.66	1.31	732	1.79	1.71	301.33	3.65	68.2171	125.558	8.9315	57			1.53	2	1	0	1
0	75	0	0	0	1	3	4	0	3	1	0	0	0	0	0	0	45	22.2721	70	176	95	71.02	10.3417	8.78	59.6	32.1	84	0.66	1.49	678	2.17	2.01	327.2	5.55	137.838	154.226	6.16752	61			1.48	2	1	0	1
0	9	1	0	0	1	3	4	0	1	1	0	1	0	0	0	0	71	21.8106	98	166	76	80.68	14.313	6.05	59.9	31.1	48	0.57	1.19	429	1.94	1.33	378.88	4.1	94.7917	113.278	8.94574	63			2.01	1	1	1	1
0	5	1	1	1	2	3	4	1	3	1	1	1	0	0	0	0	72	20.0391	77	162	87	69.06	4.87329	6.59	78.3	10	71	18.61	1.65	282	1.89	1.15	143	4.52	203.252	184.43	10.4631	43			1.37	1	1	1	1
0	44	0	1	0	1	3	4	0	3	0	0	1	0	0	0	0	56	22.4632	81	166	100	69.44	10.6467	4.96	66.4	22.6	83	6.67	1.38	733	1.81	1.88	250.3	3.489	105.308	128.503	9.45282	54			1.42	4	1	0	1
0	14	1	1	0	1	3	4	0	1	0	1	0	0	0	0	0	66	21.1553	90	155	92	65.68	4.23729	4.21	56.9	18.7	79	114.29	1.38	858	2.02	1.22	258.42	3.984	191.617	160.296	10.1335	44			1.21	4	1	0	1
0	17	0	1	0	1	3	4	0	0	0	0	0	0	0	0	0	24	25.8586	92	116	77	63.38	8.82353	5.51	72.4	17.4	100	72.22	1.77	692	2.32	1.84	338.72	3.921	275.18	106.531	8.64689	66			1.19	2	1	0	1
0	47	0	1	0	1	3	4	0	0	0	0	0	0	0	0	0	49	21.064	79	145	81	69.2	2.28938	5.88	83.2	9.8	64	4.7	1.84	674	1.37	0.96	293.8	4.049	99.115	124.424	5.86477	64			1.31	4	0	0	1
0	12	1	1	0	1	3	3	1	3	1	0	1	0	0	0	0	73	19.7599	102	207	118	79.98	16.3265	12.03	74.7	16.1	112	66.5	1.39	654	1.36	1.45	484.97	4.26	156.19	113.412	10.0267	69			1.97	1	1	1	1
0	5	0	1	0	2	3	3	0	3	1	0	0	0	0	0	0	58	19.8347	86	195	99	68.19	12.963	5.1	61.3	25.4	96	0.46	1.5	706	1.99	1.35	357.32	3.85	156.693	128.26	6.22673	61			1.44	1	1	1	1
0	39	0	1	1	1	3	4	0	0	0	0	1	0	0	0	0	46	29.2726	95	164	65	60.28	6.35104	5.01	78.9	14.1	73	18.7	1.4	830	1.65	1.98	629.5	2.24	151.724	114.908	8.51077	60			1.07	4	1	0	1
0	42	1	1	0	1	2	4	1	3	0	0	0	0	0	0	0	78	20.519	80	158	80	74.6	2.9511	6.72	67.8	20.3	103	4.88	1.67	596	2.23	1.52	137.7	4.462	155.863	182.512	9.14185	60			1.54	3	1	0	1
0	32	0	0	0	2	3	4	0	0	0	0	0	0	0	0	0	25	16.0145	96	111	98	81.78	17.5676	15.86	92.3	5.9	82	2.82	1.51	655	1.64	1.53	272.67	3.918	95.9032	82.2428	8.16905	69			2.12	4	0	0	1
0	72	0	1	0	1	3	4	0	0	0	0	1	0	0	0	0	24	18.7305	98	196	106	73.86	7.77778	8.24	87.3	9	76	1.53	1.29	1568	1.8	2.39	343.7	3.73	98.8235	110.761	9.50659	58.5			1.57	4	1	0	1
0	31	1	1	1	1	3	4	0	0	0	0	1	0	0	0	0	60	24.4628	76	125	88	69.45	6.38138	8.09	72.3	7.4	89	15.31	1.66	330	2.17	0.92	96.2	4.14	155.34	92.1601	8.43033	58			1.37	2	1	0	1
0	9	1	1	0	2	3	4	0	3	1	1	1	0	0	1	0	81	22.1367	56	180	80	72.07	13.1148	4.96	78.5	14.3	85	0.8	1.58	311	1.75	1.34	246.18	3.51	59.0164	119.826	7.8404	58			1.55	1	1	1	1
0	18	1	1	0	2	3	4	1	3	0	0	1	0	0	0	0	81	21.3107	87	133	78	69.73	11.7481	6.36	75.8	13.5	81	83.64	1.55	316	2.02	0.94	400.55	4.571	88.6662	95.9053	6.52791	70			1.45	2	1	0	1
0	76	0	1	1	2	3	4	0	3	0	0	1	0	0	0	0	62	24.6244	95	170	102	66.21	8.99281	5.28	88.9	6.8	90	15.8	1.21	1008	1.36	3.76	282.7	3.77	117.978	139.007	8.95183	65			1.28	4	1	0	1
0	50	0	1	0	1	3	4	0	1	0	0	1	0	0	1	0	30	25.8248	82	182	82	59.06	16.3613	5.33	78.5	14.2	65	2.87	1.71	1826	1.65	2.74	194.2	5.48	129.358	54.714	10.4631	61			1.15	4	1	0	1
0	5	0	0	0	2	3	3.5	0	0	0	0	0	0	1	1	0	40	21.0614	93	125	79	68.19	11.8577	6.67	76.3	18	98	7.64	1.5	522	1.85	1.37	186.63	5.08	88.4393	135.775	8.27124	57			1.44	4	0	0	1
0	22	0	0	0	2	2	4	0	0	0	0	1	1	0	0	0	30	17.9204	89	169	109	81.83	5.88235	2.96	61.2	23.7	63	1.62	1.6	515	1.9	1.66	309.47	4.273	88.574	133.588	8.04279	58			2.06	2	1	0	1
0	62	0	1	1	1	3	3.5	0	3	0	0	1	0	0	0	0	48	22.5827	82	134	94	65	10	6.26	84.5	8.9	101	18.2	1.84	1147	1.17	4.14	642	4.275	163.511	111.663	7.48099	63.3			1.26	4	0	0	1
0	6	1	1	1	1	3	4	0	3	0	1	0	0	0	0	0	74	20.223	72	158	86	68.3	7.0922	5.66	66.2	24.8	117	40.71	1.12	794	2.33	1.17	370.62	5.04	102.963	154.038	7.93487	49			1.34	2	1	0	1
0	75	0	0	0	1	3	4	0	0	1	0	0	0	0	0	0	18	20.4444	88	152	112	77.97	21.1957	6.29	70.5	22	108	1.4	1.84	481	1.81	1.38	696.4	3.929	120.206	179.39	10.1232	57			1.95	1	1	1	1
0	55	0	1	0	2	3	4	0	0	0	0	0	0	0	0	0	28	30.1038	89	149	99	53.53	10.3448	5.45	71.7	20	127	14.05	2.1	1426	1.29	1.2	22.03	4.16	325.352	80.5504	7.53321	62			0.94	4	0	0	1
0	50	0	1	0	1	3	4	0	0	0	0	1	0	0	0	0	35	22.0727	106	175	116	66.1	11.8683	7.52	68.1	21.6	96	13	1.34	889	1.96	2.05	377.8	4.056	303.03	122.636	7.29845	64.1			1.39	1	1	1	1
0	34	0	0	0	2	3	4	0	1	0	0	0	0	0	0	0	35	21.0938	86	147	94	70.61	9.25926	5.77	71.8	21.4	85	0.32	1.5	654	2	1.4	328.4	5.05	151.456	102.097	9.35497	68			1.45	2	1	0	1
0	9	0	0	0	2	3	3.5	1	3	1	1	1	0	0	0	0	69	27.0954	107	193	104	71.3	10.0104	6.61	83.4	9.1	74	11.28	1.34	272	2.02	1.4	217.43	2.84	92.053	98.2062	8.96127	59			1.47	1	1	1	1
0	79	0	0	1	1	2	4	0	0	0	0	1	0	0	0	0	42	22.367	93	127	82	74.61	11.925	5.39	74.7	21.4	98	7.55	1.27	618	2.27	1.91	1537	4.43	102.963	108.47	9.6857	47			1.67	4	0	0	1
0	4	0	1	1	1	3	4	0	3	1	0	1	0	0	0	0	60	23.8754	82	155	82	68.19	7.6087	4.95	67.1	18.3	104	1.69	2	339	2.24	1.24	98.59	5	120.231	117.01	4.98996	65			1.44	1	1	1	1
0	75	0	0	0	1	3	4	1	0	0	0	1	0	0	0	0	56	16.5661	80	170	80	75.85	10.0503	7.24	21.7	36.6	126	0.51	1.18	371	2.17	0.97	186.53	4.23	102.256	89.8091	8.73487	75			1.69	1	1	1	1
0	18	1	0	0	2	3	4	0	0	1	0	0	1	0	0	0	51	15.517	101	136	60	80.74	14.9457	11.85	89.6	6	44	1.08	1.44	334	2.27	2.1	299.25	2.62	137.931	97.9719	4.65396	58			2.02	1	0	1	1
0	6	0	1	0	1	2	4	0	1	1	0	0	1	0	0	0	58	22.7732	73	159	88	62.88	9.27419	4.13	74.2	16.8	78	0.68	1.65	819	1.63	2.27	287.08	3.76	109.091	152.795	9.6232	64			1.08	1	1	1	1
0	52	1	0	0	1	3	4	0	0	0	1	1	0	0	0	0	41	23.9062	96	178	114	70.49	13.0719	3.11	78	14.3	52	13.05	1.4	1234	1.92	2.65	84.8	4.51	20.3704	114.587	10.4631	61			1.49	4	1	0	1
0	53	1	0	1	2	3	4	0	3	1	0	0	0	0	0	0	60	26.965	97	215	114	80.57	8.42697	12.45	90	6.6	132	5.32	1.19	703	1.94	1.9	218.2	3.4	232	136.892	10.1955	65.2			1.93	1	1	1	1
0	68	0	1	1	2	3	4	0	1	1	0	0	0	0	0	0	52	21.2295	115	146	98	67.53	4.2735	3.28	69.8	19.7	101	83.28	1.45	338	2.26	1.63	376.64	3.18	147.674	110.648	7.40001	69			1.28	4	0	0	1
0	16	0	0	0	1	3	4	0	0	0	0	0	0	0	0	0	30	19.1051	92	134	91	75.49	7.08061	8.03	78.2	14	81	1.63	1.68	611	1.99	1.7	697.75	3.78	116.788	96.8442	4.6511	65			1.57	2	1	0	1
0	80	1	0	0	2	3	4	0	0	0	0	1	0	0	0	0	43	31.4256	95	135	74	78.4	7.28477	4.11	68.5	23.1	75	201.13	1.47	240	2.05	0.82	632	3.627	124.373	169.374	10.4631	55.7			1.78	4	0	0	1
0	61	0	0	0	1	2	4	0	0	0	0	0	0	0	0	0	46	16.1032	81	145	92	77.8	16.791	6.17	67.1	24.2	99	1.17	1.52	714	2.61	2.42	57.4	3.41	177.049	104.547	6.38671	64.4			1.87	4	0	0	0
0	50	0	1	1	2	3	4	0	3	1	0	1	0	0	0	0	34	24.4727	95	150	84	57.53	12.0856	7.03	78.8	11.6	84	1.57	1.48	442	2.32	1.5	116.6	2.64	130.769	168.953	7.98139	46			1.06	1	0	1	0
0	51	0	0	0	2	3	4	0	0	0	0	1	0	0	0	0	48	26.8352	96	182	109	66.41	4.03226	8.46	75.5	16.2	77	1.1	1.47	1224	1.44	2.46	259.4	4.55	87.5817	82.0138	8.798	68			1.24	4	1	0	1
0	20	0	1	0	1	3	4	0	3	0	0	0	0	0	0	0	53	25.0259	62	132	84	60.13	5.34045	6.61	74.3	11.5	87	1.37	1.87	557	2.08	2.2	286.35	2.95	200	127.129	4.65396	62			1	3	0	0	1
0	4	1	1	1	1	3	4	0	3	1	0	1	1	0	0	0	60	21.2615	86	158	92	67.85	6.75676	6.98	70.1	21.7	112	2.53	1.19	832	1.65	2.53	36.53	4.03	140.31	143.441	9.74209	65			1.32	1	1	1	1
0	30	0	1	1	1	3	4	1	3	0	0	0	0	0	0	0	61	26.5143	63	155	80	65.65	7.38916	4.92	80.5	13.4	86	1.15	1.57	706	2.16	1.75	399.26	4.5	71.0526	161.533	7.51262	62			1.25	4	1	0	1
0	4	0	0	0	2	2	4	0	0	1	0	0	0	1	0	0	46	24.2188	71	98	63	77.16	6.45161	7.28	80.4	10.4	58	20.73	2	1709	1.17	3.39	1079.67	3.05	192.857	83.1131	5.97678	62			1.63	4	0	0	1
0	57	0	1	0	1	2	4	0	1	1	0	1	0	0	0	0	53	19.2042	69	164	88	72.98	16.6667	5.91	84.5	6.8	76	0.32	1.27	508	2.04	1.69	187.1	4.006	80.7103	187.327	10.0512	64			1.64	1	1	1	1
0	41	0	0	0	1	2	4	0	0	0	0	0	0	0	0	0	48	27.4756	69	187	107	71.04	9.24658	5.33	57	33.7	102	2.64	1.37	332	2.16	1.07	169.2	4.163	151.042	87.3892	5.55528	67			1.47	4	1	0	1
0	16	0	0	0	2	3	4	0	0	0	0	0	0	0	0	0	57	20.1733	83	167	80	81.23	1.96078	4.09	75.8	18	72	1.08	1.49	388	2.02	1.28	368.84	3.67	50.3704	81.5229	6.61887	64			1.89	1	1	1	1
0	31	1	1	1	1	3	4	0	0	0	0	1	0	0	0	0	45	21.6128	71	139	95	65.25	5.32787	5.23	63.2	24.2	80	20.65	1.67	1065	2.15	1.82	444.59	3.992	103.653	90.421	7.66809	57			1.21	2	1	0	1
0	7	0	0	0	2	3	4	0	0	1	1	1	0	0	0	0	50	24.6755	103	145	97	70.43	6.49351	9.56	87.5	8.6	94	4.93	1.39	324	2.02	2.16	259.22	4.704	156.154	122.692	9.41067	55			1.41	1	0	1	1
0	12	0	1	1	1	3	4	0	3	0	0	1	0	0	0	0	59	21.8871	83	163	77	66.46	3.90625	5.63	81.7	9.3	79	25.27	1.8	1060	1.85	2.06	389.59	3.22	192.045	111.239	5.30678	68			1.24	1	1	1	1
0	16	0	1	1	2	3	4	0	0	1	0	0	0	0	0	0	57	17.3611	73	140	100	68.19	10.7143	6.22	74.6	18.5	111	10.67	1.23	155	1.65	1.14	95.31	13.86	75.8621	85.5996	8.51756	66			1.44	2	1	0	1
0	22	0	0	0	2	3	4	0	3	0	0	0	0	0	0	0	56	22.3948	96	150	95	80.72	4.58716	8.88	77.3	10.3	76	2.12	1.36	350	2.35	4.18	78.65	2.36	114	89.2638	4.65396	63			1.89	2	1	0	0
0	3	0	1	0	1	3	4	0	0	1	0	0	0	0	0	0	58	28.0843	98	107	70	68.19	7.39437	8.68	77.3	11.5	103	3.75	1.4	943	1.83	1.69	132.19	3.38	167.89	102.68	5.74387	72			1.44	1	0	1	1
0	9	0	1	1	1	3	4	0	3	0	0	1	0	0	0	0	50	21.3841	114	125	105	95.83	9.70874	4.4	76.3	13.4	73	3.88	1.86	567	1.61	1.44	191.58	5.84	87.0748	112.627	6.0339	66.8			4.79	2	1	0	1
0	6	1	1	0	2	3	4	0	0	0	0	0	0	0	0	0	36	22.8175	86	129	98	70.09	10.8696	7.29	80.3	9.9	99	24.71	0.66	932	2.43	1.77	102.74	2.96	228.736	122.169	10.3997	67			1.48	2	1	0	0
0	26	0	1	1	1	3	4	0	3	0	0	0	0	0	0	0	58	26.5095	79	176	79	69.9	9.81767	4.62	74.8	14.5	61	6.51	0.85	1139	1.57	2.1	380.92	3.54	188.732	130.976	9.33562	64			1.44	4	1	0	1
0	43	0	0	0	1	2	4	0	0	0	0	0	0	0	0	0	37	21.4309	54	145	118	72.23	4.20561	3.37	36.5	52.2	92	0.37	1.63	422	2.25	1.75	291.6	4.332	109.107	89.7098	6.09244	67			1.5	2	1	0	1
0	67	0	0	0	1	3	4	0	1	0	0	0	0	0	0	0	65	20.0288	81	155	78	75.66	5	6.62	61.7	29.5	70	4.2	1.26	613	1.66	1.42	199.1	3.507	115.745	115.904	7.97625	66.5			1.62	2	1	0	1
0	11	1	1	0	2	3	3	0	3	1	0	1	0	0	0	0	81	19.0972	90	160	75	68.19	11.1317	8.73	90	4.7	84	92.83	1.42	540	1.8	2.38	309.81	4.428	336.912	73.8415	7.86292	68			1.44	1	1	1	1
0	13	0	0	0	2	3	4	1	3	0	0	1	0	0	1	0	88	20.1333	69	169	99	72.62	8.27815	5.88	80.1	13.8	91	6.33	1.14	431	2.05	1.39	266.74	5.64	84.2932	132.522	10.4631	50			1.52	4	1	0	1
0	27	0	0	0	2	3	4	0	0	0	0	0	0	0	0	0	43	20.5347	90	156	95	74.76	7.18686	5.43	81.3	12.1	68	0.21	1.55	1054	1.56	1.62	760.62	4.35	52.4476	155.813	10.1695	56			1.6	2	1	0	1
0	14	0	1	0	1	2	4	0	3	1	0	0	0	0	1	0	77	19.63	73	193	83	69.06	9.58188	4.2	63.4	24.4	58	14.3688	2.67	367	1.89	1.55	205.84	3.78	104.386	154.009	9.91143	60			1.39	1	1	1	1
0	21	1	1	1	2	3	4	0	1	0	1	1	0	0	0	0	57	19.5717	70	159	99	44.59	15.8654	4.83	72	16	60	1.2	1.49	765	1.82	1.51	497.1	3.74	110	228.266	9.41255	30			0.78	4	1	0	1
0	30	0	1	1	1	3	4	0	0	0	0	0	0	1	1	0	53	22.4996	72	179	86	96.45	10.8871	3.61	74.7	17.3	73	10.42	1.54	1374	1.71	2.08	317.62	3.62	159.551	161.753	10.4631	51			5.77	1	1	1	1
0	37	0	0	0	2	2	4	0	3	1	0	1	0	1	1	0	59	22.21	93	190	82	54.39	2.88462	6.6	82	13	95	2.98	1.29167	161	2.14	0.75	115.1	5.84	138.065	135.736	8.94233	69			0.89	1	1	1	1
0	4	1	1	1	2	2	4	0	0	1	0	1	1	1	1	0	70	20.82	96	135	76	79.69	14.2544	4.77	80.5	8.5	96	36.5	1.0215	565	2.11	2.33	197	2.88	112.308	106.141	10.4631	34			1.94	1	0	1	1
0	8	1	0	0	2	2	4	1	0	1	0	1	0	1	0	0	56	20.22	96	132	86	73.38	10.989	7.27	55.9	31.3	76	44	1.23221	506	1.96	2.1	384.9	4.5	194.175	131.131	9.77974	20			1.56	1	0	1	1
0	15	1	1	0	2	3	4	0	3	1	0	0	0	0	1	0	51	22.77	105	130	77	46.63	8.06452	4.92	94.2	2.6	75	73.8	1.49749	461	1.74	0.71	23.19	4.29	108.442	192.815	7.5725	73			0.79	1	0	1	1
0	12	1	1	0	2	2	3	0	1	0	1	1	0	1	1	0	74	20.86	74	166	90	66.16	13.0409	6.78	79.7	9.2	84	4.96	1.23554	553	1.72	1.52	410.3	6.06	314.159	140.88	7.20192	56			1.28	3	1	0	1
0	7	0	1	0	1	2	4	0	3	0	0	1	0	1	1	0	64	19.98	96	222	144	63.57	12.2673	6.66	93.6	3.2	84	7.56	1.40408	659	2.02	2.34	332.62	3.85	52.5424	198.498	10.4631	53			1.25	3	1	0	1
0	14	1	0	0	2	3	3	0	3	1	0	1	0	0	0	0	68	19.6	89	215	110	70.98	3.23939	6.22	76.5	16.3	76	10.59	1.12969	392	2.08	1.1	18.14	3.42	136.905	196.53	9.85077	61			1.5	1	1	1	1
0	6	1	1	1	1	2	4	0	3	1	0	1	0	0	1	0	78	23.27	96	172	79	61.93	4.30293	5.75	79.2	15.7	80	7.54	1.0528	450	1.74	1.86	235.94	5.55	93.7984	192.964	8.6771	75			1.12	1	1	1	1
0	12	1	0	0	1	2	4	0	3	1	0	1	0	1	0	0	71	21.94	78	203	87	70.69	14.2315	7.95	66.8	25	72	0.35	1.32776	633	2.44	1.58	82	9.58	126.471	156.912	7.70436	66			1.52	1	1	1	0
0	18	0	1	1	1	3	4	1	3	0	0	1	0	1	0	0	47	33.01	126	218	141	63.52	6.30517	8.36	93.2	4.3	97	5.25	1.63596	582	2.05	1.05	188	5.23	36.1111	241.256	7.11721	58			1.15	3	1	0	1
0	22	0	0	0	2	3	3.5	0	0	0	0	1	1	1	0	0	74	17.36	74	118	62	63.52	20.555	4.4	82	13.1	45	1.62	1.40441	1885	2.18	3.45	249.3	2.84	153.521	110.531	8.3948	61			1.2	3	0	0	1
0	18	1	0	0	2	2	4	0	3	0	0	1	0	0	1	1	77	14.89	88	177	80	83.08	14.9254	4.5	89.9	6.2	86	3.43	1.34572	315	1.91	1.17	30.65	3.58	70	251.974	10.4631	63			2.24	3	1	0	1
0	20	1	1	1	2	2	3	1	3	1	1	1	1	1	1	0	80	24.04	88	216	97	51.85	3.9072	10	83.2	9	105	1.85	1.59048	438	2.07	1.52	110.7	4.77	129.747	134.886	9.25196	72			0.91	1	1	1	1
0	25	0	1	0	2	3	3.5	0	3	1	0	1	0	1	0	0	84	21.25	106	164	71	62.05	13.0279	11.22	94.4	1.9	120	239.63	1.46512	126	1.94	0.61	362.4	1.78	75.3247	103.586	9.73519	47			1.04	1	1	1	1
0	34	0	1	0	1	3	3.5	0	0	1	0	1	0	1	1	0	73	25.27	76	137	86	61.71	7.94877	5.06	88.3	9.7	71	4.91	1.34211	547	1.83	2.17	12.96	5.35	78.1022	152.491	9.49386	60			1.2	1	0	1	1
0	16	1	1	0	1	3	4	0	1	0	0	1	0	0	1	0	57	25.03	86	147	89	58.32	8.95415	5.36	74.7	14.5	73	20.38	1.56637	896	1.56	2.13	211.9	5.01	101.786	192.989	9.11768	75			1.07	3	0	0	1
0	53	0	1	0	1	3	4	0	1	0	0	1	0	1	1	0	48	18.55	113	155	83	72.2	10.8911	5.31	87.5	5.1	82	7.24	1.82941	541	1.54	2.41	330.5	5.96	87.4286	178.077	9.0386	71			1.55	4	1	0	1
0	60	0	1	0	1	3	4	0	1	1	0	1	1	1	1	0	65	26.67	80	140	70	69.69	7.14286	7.78	78.2	9	69	8.7	1.8324	1381	1.88	2.82	344.5	4.41	118.116	143.679	10.4631	59			1.42	1	0	1	1
0	24	0	1	1	2	2	4	0	3	1	0	1	0	1	1	0	65	18.82	84	162	90	64.44	18.3824	2.74	68.9	15.1	83	4.94	1.60101	264	1.91	0.78	1750	4.32	39.7351	116.301	9.25148	68			1.29	1	1	1	1
0	36	0	1	0	1	2	4	0	3	0	0	0	0	1	1	0	33	24.02	82	181	126	64.78	14.2276	6.95	75.2	16.7	91	1.73	1.63158	809	1.64	1.96	422.3	3.66	104.348	121.401	9.32447	63			1.31	2	1	0	1
0	20	1	1	0	1	2	3	0	1	0	0	1	0	1	1	0	56	20.58	99	148	90	63.79	15.0987	5.4	69.4	13.1	95	42.2	1.09689	825	2.05	1.05	223.8	5.7	89.8477	130.341	10.4631	57			1.3	2	1	0	1
0	55	0	1	0	1	2	4	0	0	0	0	0	0	1	0	0	54	21.25	82	132	80	64.35	9.19118	4.17	67.5	24.8	79	0.41	1.92195	930	1.51	3.1	253.6	3.18	106.122	154.502	10.4362	71			1.23	4	0	0	1
0	16	1	1	0	2	3	4	0	3	1	1	1	0	0	1	0	79	20.45	68	136	82	70.55	6.76819	5.82	78.1	11.5	93	3.63	1.25246	401	1.96	1.05	314.4	2.69	138.136	112.091	8.62927	68			1.4	1	0	1	1
0	47	0	1	1	1	2	4	0	1	1	0	1	0	1	0	0	53	22.85	87	158	80	63.19	12.8617	5.15	75.8	14	68	1.64	1.20455	824	1.62	1.73	162	4.06	335.632	110.332	7.69257	65			1.24	1	1	1	1
0	10	1	0	0	2	3	4	0	3	0	1	1	0	1	1	1	81	18.76	86	196	64	81.1	14.8104	4.35	76.5	15	106	1.45	1.51724	599	1.53	2.36	690.02	5.59	39.3013	180.094	10.4631	70			1.91	3	1	0	1
0	36	0	1	0	1	3	4	0	1	0	0	0	0	1	0	0	46	21.9	96	136	92	65.04	17.7725	4.87	61	26	77	3.12	1.62348	1542	1.54	4.18	578.3	4.02	202.41	75.8433	8.31752	58			1.22	4	0	0	1
0	20	1	1	0	2	3	4	0	3	1	0	1	0	1	1	0	54	19.77	86	202	96	73.42	9.88142	7.65	77.6	11.5	59	47.89	1.18026	915	1.63	2.21	260.3	3.84	126.4	172.689	10.4631	67			1.58	1	1	1	1
0	40	1	1	0	1	2	4	0	1	1	0	1	0	0	1	0	47	26.85	117	150	90	61.6	15.3899	7.36	73.9	17.5	93	155.26	1.21176	598	1.95	2.51	139.4	5.83	254.032	109.167	10.4631	54			1.24	1	0	1	1
0	14	0	1	0	1	2	4	0	1	0	0	1	0	1	0	0	58	24.13	103	174	87	47.66	9.17768	2.83	58.1	27.8	96	1.54	1.58031	658	1.53	1.45	34.33	3.34	152.113	101.569	7.76472	66			0.81	4	1	0	1
0	34	0	0	0	2	2	4	0	3	1	0	1	0	1	0	0	70	23.43	61	177	96	75.31	10.2564	6.06	86.2	12.1	68	16	1.51786	487	1.93	2.31	205.2	6.56	83.3333	65.7735	7.19669	72			1.49	1	1	1	1
0	9	1	1	1	1	2	4	1	3	1	0	1	1	1	1	0	69	18.22	76	152	96	71.99	13.9442	5.32	77.2	14.5	70	4.04	1.02979	956	1.77	1.97	57.3	4	49.6124	152.202	10.4631	57			1.49	1	1	1	1
0	36	0	1	0	1	3	4	0	3	0	0	1	1	1	1	0	47	22.74	82	151	85	64.61	13.1579	5.59	71.2	16.6	71	7	1.80889	574	2.14	2.27	273.1	4.81	256.522	132.087	7.19669	61			1.23	4	1	0	1
0	5	1	1	1	1	3	4	0	3	0	1	1	0	0	1	0	81	21.19	91	134	61	64.52	8.56164	9.48	88.4	4.5	80	77.04	1.20968	728	1.95	1.69	142.4	5.05	175.723	80.3017	8.36823	77			1.28	4	0	0	1
0	18	1	1	1	2	2	4	1	3	1	0	1	1	1	0	0	76	21.47	82	187	97	63.59	8.25083	4.43	89.4	6.8	85	1.22	0.78327	340	1.89	1.81	43.5	2.5	101.389	122.496	7.73631	66			1.25	1	1	1	1
0	5	1	0	0	1	2	4	0	1	0	0	1	0	1	1	0	62	15.31	77	158	90	67.44	9.56633	4.24	86.3	8.1	99	3	1.46318	898	2.07	2.73	8.25	5.06	72.5888	104.522	9.10509	68			1.3	2	1	0	1
0	31	1	1	0	2	3	3	0	1	1	1	1	0	0	1	0	82	19.1	76	145	70	66.79	11.8132	3.63	70.2	18.1	101	3.4	1.27974	563	2.11	0.62	350.6	3.69	75.188	135.04	10.4631	48			1.38	2	1	0	1
0	25	1	1	0	1	2	3	0	3	0	0	1	0	1	1	0	84	20.45	68	138	59	65.66	10.6061	5.73	71.2	14.9	92	2.53	1.26852	763.1	2.13	1.41	222.3	3.47	150.909	157.156	10.4631	36			1.32	3	0	0	1
0	26	1	1	0	1	3	3	0	3	1	0	1	0	0	1	1	59	25.09	81	181	79	63.68	22.694	4.66	56.9	33.8	112	0.4	1.3121	923	2.05	1.1	259.1	0.92	115.833	210.467	10.3224	70			1.22	1	1	1	1
0	3	1	1	1	1	3	4	0	3	0	1	0	0	1	0	0	41	26.73	87	144	93	63.23	7.34375	10.04	72.6	11	131	1.25	1.36499	1291	2.62	1.84	1044	3.09	437.079	130.151	9.00626	65			1.19	2	1	0	1
0	51	1	1	0	1	3	4	1	3	1	1	1	0	1	1	0	61	21.2	78	136	82	65.37	11.0887	6.86	78	14.2	83	13.55	1.15805	469.2	2.11	0.86	207.4	4.36	177.778	105.104	10.4631	56			1.31	1	0	1	1
0	6	1	0	0	2	3	4	0	3	1	0	1	1	0	1	0	62	19.94	98	180	105	69.92	7.92812	19.62	92.5	4.9	90	20.46	0.997175	348.7	2.08	1.59	131.3	7.6	79.5322	89.4926	9.33388	68			1.47	1	1	1	1
0	6	1	1	0	1	3	4	0	3	1	0	1	0	1	0	0	73	24.09	89	89	63	66.43	8.29475	12.91	84.2	10	89	74.4	1.03457	360.5	2.19	1.32	109.1	3.55	324.719	153.071	8.16366	41			1.34	1	0	1	1
0	39	1	1	1	1	3	4	0	3	1	0	0	1	1	0	0	45	24.22	82	180	106	65.12	12.8571	6.78	66.8	20.8	136	0.4	1.1432	957.8	2.25	2.38	428.4	3.67	1187.5	116.533	8.30499	69			1.3	1	1	1	1
0	3	1	1	0	1	3	4	1	3	1	1	1	1	0	1	0	72	25.79	98	203	101	65.13	5.49451	11.88	92.1	5.7	84	4.7	1.10095	697	1.72	1.62	236.6	3.85	237.634	102.086	10.218	64			1.31	1	1	1	1
0	30	1	1	0	1	3	4	0	3	1	0	1	1	1	0	0	56	21.12	93	180	83	67.38	9.56522	5.41	77.1	13.9	90	5	1.10765	678	2.25	0.97	97.56	3.1	169.506	115.691	10.4631	63			1.35	1	1	1	0
0	38	1	1	0	1	3	4	0	3	1	0	0	0	0	0	0	78	24.94	88	138	65	62.21	10.3093	5.36	68.1	21.9	82	12.4	1.18812	484	1.92	1.42	187.5	2.96	124.39	173.549	8.08487	59			1.16	1	0	1	1
0	18	1	0	0	1	3	4	1	3	0	0	1	0	0	1	0	57	22.67	92	159	103	66.67	10.2941	8.56	83.1	10.3	116	2.1	1.10236	880	2.11	1.72	107.1	3.71	153.39	178.133	10.4631	43			1.35	2	1	0	1
0	19	1	0	0	1	3	4	0	3	1	0	1	1	0	1	0	66	24.56	89	137	64	65.59	8.92857	4.11	71.8	15.6	79	19.73	1.38339	285	2.02	0.79	361	2.99	81.1475	123.945	10.4631	55			1.32	1	0	1	1
0	11	1	1	0	1	3	4	0	3	1	1	1	0	1	0	0	64	25.03	78	196	109	65.66	8.27068	8.36	80.8	11.2	79	0.75	1.18581	1008	1.82	1.73	323.1	4.33	154.098	161.789	9.73062	68			1.31	1	1	1	1
0	15	1	1	0	1	3	3	0	3	1	0	1	1	0	1	0	72	28.17	83	183	97	62.27	11.3884	10.84	92.5	1.9	84	109.7	1.15315	1344.6	1.48	2.91	172.7	2.77	143.939	155.366	10.3489	68			1.13	1	1	1	1
0	25	1	1	0	1	3	4	1	3	1	0	0	0	1	0	0	72	24.12	73	137	67	53.19	11.611	8.77	75.7	13.5	106	36.22	0.952128	943.9	1.9	2.22	193	0.75	116.928	99.8401	8.40849	68			0.98	1	0	1	1
0	14	1	1	0	1	3	4	0	1	1	1	1	1	0	0	0	61	24.21	78	142	72	65.45	9.48407	9.59	73.9	25.6	55	3.1	1.28352	554	1.9	3.1	45.61	3.62	1393.75	329.034	9.80912	59			1.32	1	0	1	1
0	11	1	0	0	2	3	3	0	1	1	1	1	1	1	1	0	69	25.97	90	149	86	64.51	12.8571	10.64	84.7	8.8	86	102.9	1.0437	597.6	2.11	1.63	603.5	2.42	280.208	143.758	10.4631	43			1.27	1	0	1	1
0	25	1	1	0	1	3	4	0	3	1	0	0	0	1	0	0	79	21.72	80	165	75	65.53	9.64912	12.07	90.7	4.2	127	214.93	1.0179	325.8	2.52	1.09	28.18	3.05	241.026	99.1187	7.6009	64			1.31	1	1	1	0
0	25	1	0	0	1	3	3	1	3	1	1	1	1	1	1	0	76	23.46	78	168	78	66.75	13.3333	6.99	73.1	12.9	77	5.5	1.15549	1003	1.76	1.84	178.5	3.57	131.522	182.61	10.4631	67			1.32	1	1	1	1
0	31	1	0	0	1	3	3	0	3	1	0	1	1	0	1	0	85	32.46	93	179	48	66.34	12.7993	12.21	87.6	4.9	76	18.8	1.45833	1011.7	1.83	3.27	475	5.46	85.4701	141.874	9.74765	63			1.32	1	1	1	1
0	7	1	1	0	1	3	3	1	3	1	0	1	1	1	0	0	74	24.35	69	164	87	66.43	14.0774	8.18	89.9	3.5	92	106	1.24373	520	1.89	1.43	140.6	5.09	120.567	118.641	9.61447	64			1.33	1	1	1	1
0	28	1	0	0	1	3	4	0	1	0	0	1	1	1	0	0	52	27.07	80	163	86	66.73	10.6732	12.22	92.1	3.4	98	45.98	0.752887	503.2	2.11	1.12	224.4	3.84	135.294	130.845	10.3317	54			1.33	4	1	0	1
0	5	1	0	0	1	3	4	0	3	1	0	1	1	0	1	0	63	29.51	82	142	73	63.28	12.6939	8.93	83.8	7.2	77	71.5	1.09877	502	1.86	1.6	338.7	5.84	107.738	130.524	10.4631	71			1.18	1	0	1	1
0	15	1	1	0	1	3	4	0	3	0	1	1	0	1	0	0	74	28.76	89	156	91	65.12	12.3796	24.5	89.4	5.1	74	211.4	0.911043	816	1.92	1.51	216	2.16	350	117.657	9.47463	61			1.3	2	1	0	1
0	3	1	1	0	1	3	4	0	3	1	0	1	0	0	1	0	15	24.17	88	142	78	66.41	11.1538	6.81	88.3	6.6	90	53.1	1.21154	1276	1.52	1.73	392.5	3.94	87.9121	111.951	10.4631	47			1.32	2	1	0	1
1	38	0	1	0	1	3	4	1	3	1	0	0	0	1	1	0	56	23.66	77	167	84	64.79	8.03571	6.82	56.1	34.3	153	0.5	1.40217	776.6	1.61	1.87	260.8	5.45	106.338	141.91	6.27344	76			1.24	1	1	1	1
1	46	0	1	1	1	3	3.5	0	3	0	1	1	0	1	0	0	71	23.42	67	106	61	62.62	14.827	5.1	83.7	7	77	3.4	1.3442	320	2.05	1.12	214.8	3.06	91.9118	130.804	9.2535	52			1.16	1	1	1	1
1	35	0	0	0	1	3	4	0	3	0	0	0	0	1	1	0	45	24.34	85	170	101	66.74	11.4583	8.87	76	19.6	51	2.1	1.3871	927	1.15	2.24	412.8	4.01	295.652	109.464	10.0363	65			1.38	2	1	0	1
1	35	0	1	1	1	3	4	0	1	0	0	0	0	0	0	0	20	20.28	75	160	99	64.63	10.8696	7.33	74.3	16.6	72	4.18	1.36538	1443.1	1.65	2.39	448	4.24	260.448	113.159	10.4631	53			1.28	2	1	0	1
1	42	0	0	0	1	2	3.5	0	3	1	0	1	0	0	1	0	75	21.48	65	174	91	65.01	10.9091	7.47	93.3	2.1	78	51.3	1.00556	1350	1.44	3.87	222.4	2.71	158.929	94.5901	10.4631	68			1.29	1	1	1	1
1	34	0	0	0	1	3	4	0	1	0	0	1	0	1	0	0	64	22.89	94	146	64	63.69	13.6364	8.84	83.1	10.7	83	25.4	1.42105	1165.1	1.1	4.86	349.8	3.25	236.471	122.44	8.82908	66			1.18	2	0	0	1
1	50	0	0	0	1	2	4	0	3	0	0	1	0	1	0	1	77	24.24	82	153	82	66.57	10.2679	9.18	87.4	8.3	62	7.78	0.861035	806	1.82	2.18	259.2	5.22	125.455	117.783	9.83804	65			1.34	3	1	0	1
1	34	0	0	0	1	3	3.5	0	1	0	0	1	0	1	1	0	31	17.07	82	138	86	65.33	8.36237	6.33	71.3	10.7	86	0.23	1.37	819.9	2.23	1.24	95.34	4.6	171.429	129.433	9.93581	53			1.2	2	1	0	1
1	34	0	1	0	1	3	4	0	3	0	0	0	0	0	1	0	28	24.22	111	199	125	59.89	12.1429	7.29	81.5	13	95	6.91	1.36	1265	2.1	2.66	267.8	4.11	221.782	153.96	10.4631	63			0.98	2	1	0	1
1	55	0	1	0	1	3	4	0	3	0	0	1	0	1	0	0	45	21.72	65	168	108	63.19	8.84615	8.73	84.3	11.3	125	0.68	1.46284	756.7	2.15	1.61	389.3	3.18	90.8397	108.689	7.57456	70			1.28	4	1	0	1
1	15	1	1	0	1	3	4	0	3	1	0	1	1	0	1	1	65	23.88	84	163	94	62.33	9.61538	7.31	79.4	11.6	124	0.64	1.16564	573.6	1.71	0.61	73.47	3.38	99.1597	98.4219	10.4631	63			1.19	1	1	1	1
1	26	0	1	0	1	2	4	0	3	1	0	1	0	1	0	0	55	26.35	102	112	82	63.28	11.4286	6.76	74.2	17.3	140	6.9	1.33611	1821	1.91	2.92	361.3	5.24	202.174	71.644	8.56178	61			1.19	1	1	1	1
1	12	1	1	0	1	3	3	1	3	1	0	0	1	1	0	0	69	26.38	83	163	78	63.43	13.0426	8.37	67.2	25.3	121	1.7	1.44815	416	2	1.78	283.3	5.66	210.87	128.235	6.62154	76			1.27	1	1	1	1
1	23	1	1	0	1	3	4	0	3	1	0	1	1	1	1	0	72	20.45	79	155	76	67.09	9.54545	17.61	74.6	13.508	92	123	0.963415	829	1.92	1.49	227.3	4.09	120.373	110.048	9.76961	70			1.34	2	1	0	1
1	53	0	1	0	1	3	4	0	1	0	0	1	0	0	1	0	59	19.05	81	147	77	65.43	8.5	4.9	55.2	31.7	85	0.7	1.04676	753	1.75	2.24	265.1	4.05	58.3333	145.694	10.3567	51			1.31	1	1	1	1
1	38	1	1	0	1	3	4	0	0	1	1	0	1	0	1	1	69	25.08	85	130	70	66.12	8.84615	4.4	66.3	18.1	96	3.9	1	933	2.06	1.4	276.8	3.06	164.22	129.901	8.42332	68			1.32	2	1	0	1
1	8	1	1	0	1	3	3	1	3	1	0	1	1	1	1	0	68	25.16	82	142	86	64.29	10.0091	7.22	80	6.8	127	1.5	1.19484	450	2.2	2	159.3	4.76	164.348	112.765	8.49821	68			1.28	1	1	1	1
1	35	0	0	0	1	3	4	0	1	0	0	1	0	0	0	0	45	21.08	67	156	89	68.87	8	8.98	80.8	7.9	83	0.49	1.21471	1523.1	2.14	2.89	197.5	6.3	127.389	108.588	10.034	65			1.35	2	1	0	1
1	6	1	0	0	1	3	3	0	0	0	1	1	1	1	0	0	80	24.44	87	134	81	66.99	9.87013	12.44	81.2	9.9	113	68.7	1.24422	533	2.06	2.91	185.1	4.78	72.6829	125.535	10.4631	64			1.33	4	1	0	1
1	38	0	1	0	1	3	4	0	3	0	0	1	1	1	0	0	35	20.41	110	182	89	67.79	10.4736	8.11	89.3	6.8	68	32.28	1.04399	1728.3	0.96	2.81	479.8	5.4	100.99	86.1326	10.4631	44			1.33	2	1	0	1
1	48	1	1	0	1	3	4	1	3	1	1	1	1	1	1	0	66	27.89	65	124	68	66.25	12	5.61	78	13.6	131	1.6	1.17839	667	2.11	1.38	357	6.58	106.77	96.6715	8.14902	66			1.31	1	1	1	1
1	51	0	0	0	1	2	4	0	0	0	0	1	0	1	1	1	68	23.78	101	121	78	66.75	10.6383	6.76	88.6	5.6	68	121.64	1.17726	742.9	1.33	2.22	83.26	4.42	133.607	143.41	10.4631	73			1.31	2	0	0	1
1	50	0	1	0	1	3	4	0	3	0	0	0	1	1	0	0	69	25.56	95	140	77	67.51	11.5079	7.16	71	16.2	111	67.51	1.10099	1156.5	2.09	2.6	461.3	5.3	393.902	118.126	7.30854	65			1.33	3	0	0	1
1	37	0	0	0	1	3	4	0	3	0	0	0	0	1	0	0	40	19.82	71	168	102	70.19	14.8936	7.47	85.6	9	93	0.48	1.34951	1134	1.91	2.15	158.3	3.9	56.9697	115.591	8.63284	73			1.38	2	1	0	1
1	34	0	1	0	1	3	4	0	3	0	0	1	0	0	1	0	83	23.51	71	154	78	65.7	8.20312	3.33	66.8	17.5	85	0.99	1.23529	1004	1.64	2.6	310.6	4.44	68.1818	92.7769	8.7456	68			1.31	2	1	0	1
1	36	0	1	0	1	3	4	0	3	1	0	1	0	0	1	0	82	17.93	80	161	77	66.33	11	5.28	80.8	9.7	84	24.7	1.07059	469	2.02	2.3	652.4	4.5	136.364	140.766	10.4631	50			1.32	1	1	1	1
1	21	0	1	0	1	3	4	0	3	1	0	0	0	1	0	0	51	24.31	90	118	80	65.43	13.4328	4.54	75	15.6	127	3.43	1.43077	1041	2.21	1.9	249.1	4.19	221.429	149.316	8.01731	69			1.31	1	1	1	1
1	7	1	0	0	1	3	4	0	3	0	0	1	1	1	1	0	56	18.58	75	146	82	66.76	11.4943	6.26	84.8	7.7	78	4.41	0.966102	930	1.62	2.99	552.6	5.31	114.925	111.849	10.4631	43			1.32	2	1	0	1
1	33	1	0	0	1	3	3	0	3	1	1	1	1	1	1	0	71	19.63	76	161	76	69.63	8.63787	15.84	92.6	2.8	101	10.87	1.10306	337.4	2.02	1.45	214.2	6.17	35.1562	161.298	10.4631	50			1.37	1	1	1	1
1	28	0	1	0	1	3	4	0	0	1	0	0	1	1	0	0	56	19.83	64	139	88	66.32	6.94444	6.49	77.1	13.4	129	1.43	1.68826	806	2.56	2.04	28.3	4.97	145.714	118.555	7.36834	73			1.32	1	1	1	0
1	52	0	0	0	1	3	3	0	3	0	0	1	1	1	0	0	65	25.15	90	126	72	68.83	3.22581	14.72	86.6	5.2	68	107.3	0.77135	588	1.83	1.78	98.26	3.12	554.386	74.0227	9.64336	64			1.35	4	1	0	1
1	50	0	1	0	1	3	4	0	3	0	0	0	1	0	1	0	45	21.95	70	157	93	67.72	4.41176	4.83	80.5	11.5	92	0.67	1.65844	637.4	1.98	2.07	461.1	4.85	54.4503	113.269	8.03106	70			1.33	2	1	0	1
1	36	0	0	0	1	3	4	1	1	0	0	0	0	1	1	0	20	22.86	79	144	102	65.37	8.75	8.04	76.6	13.9	104	5.11	1.03003	898.3	1.89	2.41	110.2	6.59	92.2431	90.0191	10.4631	61			1.31	2	1	0	1
1	12	1	0	0	1	3	4	0	1	1	0	1	0	1	1	0	50	24.41	79	186	105	65.05	8.8	9.61	78.4	12.3	146	0.33	1.01894	451	1.71	2.2	224.9	5.89	96.6667	115.869	10.0254	66			1.29	1	1	1	1
1	31	1	1	0	1	2	4	1	3	1	1	1	1	0	1	0	62	20.17	75	114	75	66.03	7.84314	13.6	68.7	6.3	96	65.41	0.581952	381	2.04	1.24	103.2	2.65	427.059	157.888	10.4631	71			1.31	1	1	1	1
1	36	0	1	0	1	3	4	0	0	0	0	0	1	1	0	0	32	42.24	89	135	77	57.79	8.91304	10.4	94.6	2.6	124	36.35	1.41636	340.4	2.06	1.1	204.7	5.2	108.065	85.5736	5.93304	61			0.93	2	1	0	1
1	23	0	1	0	1	3	4	0	3	1	0	0	1	1	0	0	48	27.75	70	209	109	67.77	10.3359	12.55	86.4	8.8	115	2.95	1.01439	844.7	2.24	1.57	122.2	2.41	111.111	141.154	10.2511	62			1.32	1	1	1	1
1	13	1	0	0	1	3	4	0	1	1	1	1	0	0	1	0	74	19.6	79	156	87	68.84	13.1027	4	61.4	22.4	75	34.88	0.918129	567	1.97	1.25	96.85	2.27	63.4328	138.537	10.4631	57			1.33	1	1	1	1
1	49	0	0	0	1	3	4	0	3	0	0	0	0	1	0	0	45	23.44	86	152	84	67.56	6.66667	6.95	70.4	20.9	94	0.88	1.17564	1143	2.23	1.39	68.16	5.12	145.251	140.335	8.83506	60			1.32	2	1	0	1
1	52	0	1	0	1	3	4	0	3	1	0	0	1	0	1	0	42	20.62	94	118	88	67.78	13.1148	7	76.4	16	92	33.01	0.680412	219.8	2.24	1.34	107.5	3.4	287.273	144.028	10.4631	55			1.32	1	1	1	1
1	34	1	0	0	1	3	4	0	3	1	1	0	1	1	0	0	56	17.19	70	115	67	69.36	14.2045	6.25	72.8	18.4	122	0.3	1.15385	696	2.4	0.9	47.91	6.33	88.015	121.102	7.90027	68			1.36	2	0	0	0
1	52	0	0	0	1	3	4	0	3	0	0	0	0	1	0	0	32	22.58	88	167	107	63.75	14.5833	7.08	78.2	11.8	72	14.21	1.26524	1509	1.72	3.01	431.8	4.69	158.621	138.614	10.4631	65			1.26	2	1	0	1
1	9	1	0	0	1	3	4	0	3	0	0	1	1	1	1	0	55	26.56	93	123	78	65.52	7.14286	10.18	67.7	23.2	75	242.9	0.970443	513	2.18	1.33	553.3	2.95	273.563	162.796	9.69345	64			1.31	2	1	0	1
1	10	1	1	0	1	3	4	0	3	1	1	1	0	0	1	0	77	28.08	88	165	74	63.27	10.2941	9.12	76.5	13	113	4.8	1.24679	613	1.83	0.95	108.3	3.68	393.243	132.92	6.62539	77			1.18	1	1	1	1
1	34	0	1	0	1	3	4	0	3	0	0	0	0	1	1	0	27	23.39	100	160	82	65.16	10.3571	6.4	86.6	8	67	2.1	1.33754	2181	1.64	4.07	1081	2.85	236	82.7039	9.36692	68			1.3	3	1	0	1
1	23	0	0	0	1	3	4	0	3	1	0	0	1	1	0	0	71	23.81	89	156	71	63.54	14.0909	6.61	75.4	8.2	116	5.2	1.02778	614	1.73	1.14	446.3	4.13	340.741	123.11	8.23271	71			1.25	1	1	1	1
1	52	0	1	1	1	3	4	0	3	0	1	1	0	0	1	0	57	27.55	59	223	102	63.49	11.6667	7.95	79.4	11.2	89	8.94	1.15141	1353.7	1.38	2.78	256.7	4.12	141.667	140.341	10.4631	64			1.23	1	1	1	1
1	59	0	1	0	1	3	3	1	3	0	0	0	1	0	1	0	76	24.39	75	120	82	66.19	13.0208	6.67	86.8	7.7	76	4.93	1.41637	1155.3	1.6	0.86	453.6	4.7	77.3438	113.98	10.4631	62			1.31	2	1	0	1
1	44	0	0	0	1	3	4	0	3	0	0	1	0	1	0	0	50	20.31	70	115	64	64.79	8.65385	5.83	78.7	13.2	93	1.6	1.40984	990	1.53	2.19	87.79	3.55	142.75	100.164	9.37186	70			1.28	2	1	0	1
1	50	0	1	1	1	3	4	0	3	1	0	1	0	0	1	0	51	23.66	85	226	127	66.26	12.8571	5.93	77.4	13.8	79	3.7	1.00385	647	1.93	1.59	201	7.33	87.2577	141.814	8.22067	69			1.3	1	1	1	1
1	34	0	1	0	1	3	4	0	3	0	0	0	0	1	0	0	58	26.03	87	146	84	64.54	12.3377	6.16	59.1	9.7	94	1.93	1.23466	1091	1.98	1.71	57.32	3.53	157.812	117.888	8.82893	64			1.27	1	1	1	1
1	34	0	0	0	1	3	4	0	3	0	0	1	0	1	1	0	35	26.57	100	139	98	69.63	9	7.73	77.1	13.1	51	5.94	1.47735	1801.2	2.2	2.99	570.2	3.35	202.532	122.008	10.2036	62			1.32	2	1	0	1
1	43	0	1	0	1	3	4	0	1	0	0	0	1	1	0	0	34	25.73	79	137	87	58.6	11.039	7.22	83.2	8.1	79	9.14	1.45608	998.8	1.94	2.82	1498	2.97	217.46	97.5425	9.42658	60			1.03	2	1	0	1
1	44	0	0	0	1	3	4	0	3	0	0	0	0	1	0	0	43	19.47	70	130	80	66.69	10.9375	5.84	85.5	9.3	49	2.1	3.17373	988	1.63	2.32	429.8	4.4	103.297	137.453	9.84718	76			1.33	2	1	0	1
1	4	1	0	0	1	3	4	0	0	0	0	0	1	1	0	0	70	22.23	74	139	78	68.81	11.5527	5.78	66.6	18	86	49.31	1.20552	500	2	0.96	328.7	4.3	223.276	155.009	9.36306	63			1.34	2	0	0	1
1	38	0	0	0	1	3	4	0	3	0	0	1	0	1	1	0	86	17.58	85	193	111	74.35	8.88889	14.53	90.1	2.9	108	5.27	0.935567	660.5	1.91	1.92	330.2	4.81	108.571	92.2394	10.4631	60			1.43	1	1	1	1
1	50	0	0	0	1	3	4	0	3	0	0	1	1	1	0	0	51	19.72	72	109	69	67.78	11.4583	4.12	67.3	17.9	73	0.3	1.40702	784	2.09	2.1	373.4	2.44	124.49	102.028	8.42266	75			1.33	2	1	0	1
1	51	0	0	0	1	3	4	0	1	0	0	1	1	1	1	0	47	17.73	77	159	107	69.65	9.63855	4.65	77.2	14.3	70	0.2	1.52652	1546	2.23	2.48	88.98	3.86	61.0169	152.845	9.38773	63			1.36	2	1	0	1
1	69	0	1	0	1	3	4	0	3	1	0	1	0	1	0	0	50	20.25	95	159	114	67.13	6.97026	9.12	94.4	3.1	147	0.1	1.42194	719	1.85	2.63	118.8	3.37	141.346	84.4223	8.04463	69			1.32	1	1	1	1
1	8	1	0	0	1	3	4	1	3	1	0	1	1	1	1	0	75	25.3	89	210	88	66.47	8.75	8.94	80.7	13.8	81	6.6	1.01618	659	1.68	1.76	304	4.17	106.364	171.199	10.4347	74			1.32	1	1	1	1
1	19	1	1	0	1	3	4	0	3	0	0	1	0	1	1	0	39	30.07	74	140	82	57.83	9.44444	6.76	83.3	9.9	53	1.95	1.57025	2209	1.59	4.2	317.4	3.07	174.074	161.945	10.4631	68			1.05	2	1	0	1
1	43	0	0	0	1	2	4	0	0	0	0	0	1	1	0	0	56	19.98	69	125	69	65.47	10.5699	3.26	81.8	13.6	89	11.25	0.961988	474	1.36	1.54	300	3.54	124.194	126.749	8.39367	66			1.3	2	1	0	1
1	44	0	1	0	1	3	4	1	1	0	0	1	0	0	1	0	46	21.19	80	169	94	67.79	13.2325	3.87	81.4	9.3	63	2.1	1.91489	495	1.82	1.51	686.4	3.41	55.2632	93.5504	10.2954	41.5			1.31	2	1	0	1
1	43	0	0	0	1	3	4	0	1	0	0	0	1	0	0	0	48	16.85	90	141	89	68.82	9.7561	4.38	38.7	7.4	114	10.6	1.1614	966	2.01	1.46	373	4.43	116.854	78.8225	10.4631	50			1.33	2	1	0	1
1	20	1	1	0	1	3	3	1	3	1	1	0	1	1	0	0	72	24.1	82	149	85	62.58	15.7908	10.53	87.4	5.2	82	6.23	1.33987	517.2	1.78	1.36	313.2	3.32	83.0357	99.8537	10.3282	71			1.23	1	1	1	1
1	25	1	1	0	1	3	4	0	3	1	0	1	0	1	1	0	59	30.22	117	157	83	64.59	9.39597	11	78.2	10.2	71	7.1	0.91844	1093	1.83	2.46	249.3	4.37	268.367	116.959	9.33565	59			1.28	2	1	0	1
1	49	0	0	0	1	3	3	0	1	1	0	0	1	0	0	0	54	20.83	100	222	134	68.45	19.8718	9.43	84	10.5	85	2.3	0.850829	452	1.98	1.15	150.2	5.49	139.423	113.256	10.4631	69			1.36	1	1	1	1
1	35	0	0	0	1	3	4	0	1	0	0	0	0	1	1	0	69	27.15	76	154	79	64.32	8.15217	8.77	85.2	8.1	69	43.8	1.44727	930	1.23	2.37	222.6	2.3	191.566	99.7941	8.50593	74			1.25	2	1	0	1
1	11	1	0	0	1	3	4	0	1	1	0	1	0	0	1	0	55	25.48	82	142	86	67.18	8.06452	7.06	75.6	17.1	94	4.57	1.13287	216.6	2.14	1.62	67.41	6.82	69.7183	123.519	9.804	54			1.33	1	1	1	1
1	12	1	1	0	1	3	4	0	1	1	1	1	1	1	1	0	55	35.43	82	159	80	60.74	10.75	8.5	82.5	10.9	135	65.04	1.12141	388.2	2.07	1.17	112.2	4.4	102.19	87.3396	9.63122	74			1.14	1	1	1	1
1	5	1	1	0	1	3	4	0	3	0	0	0	1	1	0	0	33	27.66	89	111	77	66.45	10.8844	10.36	81.6	8.9	123	3.82	1.36336	991.8	2.17	1.99	63	4.22	446.377	103.432	9.6475	51			1.31	2	1	0	1
1	21	1	1	0	1	3	4	0	3	1	0	0	0	1	1	0	44	37.29	73	144	81	64.49	7.45192	9.04	80.7	10.4	111	0.8	1.64158	917	2.15	4.02	157	4.17	595.833	93.3319	6.98379	71			1.29	2	1	0	1
1	35	1	0	0	1	3	4	0	1	1	1	1	1	1	1	0	75	21.78	78	126	90	69.98	13.2075	5.91	74.9	13.4	90	5.2	1.09632	917	1.73	1.66	352.6	3.4	76.8595	121.171	10.117	59			1.35	2	1	0	1
1	36	0	0	0	1	2	4	1	3	0	0	1	0	0	1	0	46	24.98	85	164	82	59.93	11.102	6.03	78	15.7	98	0.75	1.31579	772	1.74	1.58	385.7	3.15	104.027	120.317	9.15726	70			1.14	2	1	0	1
1	24	1	1	0	1	3	4	0	3	1	1	1	1	1	1	0	67	25.71	89	144	90	66.77	12.8571	3.23	75	13.4	84	20.07	1.01361	517	1.98	1.19	25.24	4.4	337.662	84.2537	9.41442	73			1.32	1	1	1	1
1	43	0	1	0	1	2	4	0	3	0	0	1	0	1	0	0	68	23.67	82	150	83	64.49	12.7586	3.64	73.9	11.8	79	1.9	1.33681	1854	1.78	3.74	624	2.91	141.584	110.057	8.84937	72			1.28	2	0	0	1
1	13	1	1	0	1	3	4	1	1	0	1	1	1	1	0	0	74	22.07	72	151	84	66.35	11.489	5.72	83.4	9.5	52	0.96	1.34859	888	1.57	2.09	598.5	3.57	179.798	96.2337	7.6014	71			1.31	2	1	0	1
1	51	0	0	0	1	3	4	0	1	0	0	1	0	0	0	0	79	26.9	78	136	72	65.39	9.01254	6.19	61.9	26	90	2.9	1.25074	726	2.11	1.56	196.3	4.12	123.729	117.671	8.11343	72			1.3	4	1	0	1
1	8	1	1	0	1	3	3	0	3	1	1	1	1	0	1	0	75	28.76	98	166	82	63.13	11.4286	4.03	59	27	73	2.73	1.30877	752.3	1.92	1.4	325.9	2.29	165.957	118.363	10.4631	59			1.24	1	1	1	1
1	38	0	1	0	1	3	4	0	3	0	0	1	0	1	0	0	22	23.49	115	155	99	66.47	11.6893	9.4	93.5	4.4	90	1.35	1.44186	1091	2.32	1.69	107.1	4.01	94.8718	124.659	8.82805	60			1.31	2	1	0	0
1	24	1	1	0	1	3	3	0	1	1	1	1	0	1	0	0	83	23.88	78	126	62	64.89	7.63035	12.88	78.9	10.3	84	6.4	1.18576	728	2.02	2.08	62.82	3.99	150.602	149.748	9.50993	60			1.29	1	1	1	1
1	45	0	1	0	1	3	4	0	1	1	0	1	1	1	1	0	58	23.31	88	159	74	59.96	8.07692	11.58	92.5	3.7	97	33.97	1.1978	651.7	1.78	0.42	174.2	3.62	86.6667	100.652	9.93547	74			1.11	1	1	1	1
1	9	1	1	0	1	3	4	0	3	1	1	1	0	1	0	1	65	21.87	78	125	78	68.49	6.55738	8.58	91.9	4.9	103	87.01	1.02417	509	1.84	1.33	42.29	5.12	55.9701	129.406	9.70418	62			1.36	1	1	1	1
1	35	0	0	0	1	3	4	0	3	0	0	1	0	0	1	0	34	22.03	103	181	102	64.72	11.8182	4.59	78.1	13.5	89	1.8	0.87027	812.7	2.06	2.52	230.3	6.06	88.5796	137.138	9.47876	63			1.29	1	1	1	1
1	42	0	1	0	1	3	4	0	3	0	0	0	0	1	0	0	76	23.28	86	148	81	66.23	9.00164	4.53	82.3	10.8	91	1.18	1.63052	635	2.09	1.85	252.3	4.65	136.986	102.763	7.87207	68			1.31	1	1	1	1
1	34	1	0	0	1	3	4	0	3	1	1	1	0	0	1	0	71	22.83	79	195	73	59.94	15	4.67	72	14	80	6.6	0.879154	1003	1.67	2.78	321.3	4.36	171.25	203.505	10.4631	66			1.09	1	1	1	1
1	11	1	0	0	2	2	4	0	1	0	1	1	1	1	0	0	83	24.69	101	158	93	58.47	9.08304	6.17	90.3	5.8	124	8.79	1.2377	610.9	2.22	0.41	96.79	4.16	51.0949	161.03	10.4574	65			1.07	2	1	0	1
1	17	1	0	0	1	3	4	0	1	1	0	0	1	1	1	0	64	18.83	78	156	68	63.85	13.8298	5.82	68.7	25.3	53	0.92	1.41606	1153.9	1.87	3.5	263.8	6.33	178.947	156.591	9.81427	61			1.21	1	1	1	1
1	26	0	1	0	1	3	4	1	3	1	0	1	1	1	1	0	64	28.35	77	161	71	64.96	11.9565	7.03	78.3	10.8	80	39.31	0.965035	1070	1.68	2.73	207.3	4.24	211.57	136.274	8.98645	64			1.29	1	1	1	1
1	49	0	1	0	1	3	4	0	3	1	0	1	1	1	0	0	78	28.01	93	180	85	65.02	1.5625	7.65	72.7	12.9	100	7.85	1.0028	363.9	2.12	1.37	111	8.58	206.78	86.7868	7.45876	66			1.29	1	1	1	1
1	14	1	1	0	1	3	4	0	3	0	0	0	1	1	0	0	24	23.78	120	180	115	67.58	9.02778	19.21	88.5	5	84	126.99	1.69403	1063.2	2.29	1.2	172.4	3.3	123.333	117.92	10.4631	63			1.36	2	1	0	0
1	41	0	0	0	1	3	4	0	3	0	0	0	1	1	0	0	59	18.03	83	137	90	65.52	17.7778	8	73.4	18.9	108	0.499	1.19582	947.4	1.65	2.05	389.7	4.96	190.798	128.175	8.65609	64			1.3	2	1	0	1
1	13	1	1	0	2	3	4	0	3	1	1	1	0	1	1	0	86	21.91	63	216	74	67.59	6.01852	5.85	70.1	12.7	92	10.01	1.06688	539.5	1.94	1.72	253.8	3.59	190.217	138.527	9.3051	69			1.36	3	1	0	1
1	24	1	1	0	1	3	4	0	1	0	0	1	0	1	1	0	65	22.66	89	112	68	67.39	10.7759	6.74	83.2	6	78	228.4	1.22508	751	2.14	2.18	140.2	2.84	119	74.7285	9.47155	70			1.35	2	1	0	1
1	9	1	0	0	1	3	3	0	3	1	0	1	0	1	1	0	69	29.9	69	166	60	56.49	8.57143	7.62	87.3	8	113	16.66	1.13953	378.3	2.23	1.98	200	4.12	110.106	114.879	9.9464	47			0.95	1	0	1	1
1	14	1	1	0	1	2	4	1	1	1	0	1	0	0	0	0	69	27.52	84	134	100	67.41	3.63901	11.26	76.2	13.6	81	36.28	1.45196	193.8	2.07	1.12	510.9	2.29	214.603	170.601	9.36469	52			1.35	1	0	1	1
1	45	0	0	0	1	3	4	0	3	0	0	1	1	1	0	0	43	19.36	84	166	106	62.16	9.48767	6.6	74.6	18.5	70	1.9	1	287	1.82	0.25	355.1	5.2	139.394	135.281	9.15324	72			1.19	2	1	0	1
1	40	0	1	0	1	3	4	0	3	0	0	1	0	1	0	0	55	19.45	96	137	67	65.31	10.7388	8.33	78.6	15	110	0.47	1.2137	980	2.13	2.32	200.8	3.89	125.333	107.38	7.01212	76			1.28	2	1	0	1
1	42	0	1	0	1	3	4	0	3	0	0	0	0	0	0	0	49	30.85	65	139	71	64.67	3.27381	4.76	62.9	27.5	88	31.51	0.946078	781.6	2.23	2.01	93.48	4.57	175.833	79.4793	6.8902	58			1.26	2	1	0	1
1	40	0	1	0	1	3	4	0	3	0	0	0	1	0	1	0	46	22.68	85	156	85	63.53	12.7049	9.76	86	5.1	105	13.68	1.62976	1287	1.33	3.07	335.9	4.23	273.973	136.106	10.1354	70			1.23	2	1	0	1
1	40	0	1	0	1	3	4	0	1	0	1	1	0	1	0	0	59	21.34	78	144	79	65.69	9.82143	7.33	76.1	13.8	107	4.33	1.09272	768	1.83	2.96	392.4	2.8	164.279	126.608	8.26976	67			1.29	1	1	1	1
1	40	0	1	0	1	3	4	0	3	0	0	1	0	0	0	0	60	20.79	94	145	86	67.22	13.6926	6.59	80.3	10.2	94	1.87	1.28333	1128.7	2.21	1.68	228	4.04	260.36	90.6711	10.4631	45			1.32	1	1	1	1
1	40	0	0	0	1	3	4	0	3	0	0	1	0	1	1	0	32	19.14	120	176	125	69.93	14.2857	5.8	76.4	17.7	96	1.01	1.53913	1012.9	2.08	2.68	322.1	6.71	75	184.38	10.4631	57			1.38	2	1	0	1
1	20	1	0	0	1	3	4	0	3	0	0	0	0	1	1	0	58	21.48	94	147	87	66.47	9.54545	8.33	81.6	11.4	113	4.84	1.82812	826.5	2.45	2.05	690.9	4.8	217.91	88.2651	6.16226	65			1.31	2	1	0	1
1	39	0	1	0	1	3	4	0	1	0	0	1	0	1	0	0	71	24.65	95	140	70	63.24	9.92366	11.41	92.7	4.7	62	56.78	1.4311	1149.3	1.55	5.71	306.2	3.94	115.436	98.7746	8.14671	69			1.22	1	0	1	1
1	61	0	0	0	1	3	4	0	3	0	0	1	1	1	0	0	77	21.5	85	173	82	64.12	9.31373	4.87	83.3	11.9	102	1.24	1.4749	939	1.92	2.5	536	3.71	110.526	115.487	7.45934	68			1.25	3	1	0	1
1	37	0	1	0	1	3	4	0	1	0	0	1	1	1	0	0	42	22.48	75	161	101	64.59	12.2881	7.64	62.1	18.6	78	6	1.22388	1243	1.21	2.04	255.9	7.1	142.347	115.658	10.3136	67			1.28	2	1	0	1
1	37	0	1	0	1	3	4	0	1	0	0	0	1	1	0	0	52	24.17	97	125	64	63.76	4.61538	6.96	63	28.1	93	1.83	1.02134	376	1.99	1.86	77.64	5.25	280.769	128.469	7.70796	65			1.26	2	1	0	1
1	36	0	1	0	1	3	4	0	3	0	0	1	0	0	1	0	54	22.35	92	180	112	65.05	8.31947	5.78	71.1	17.5	82	40.8	0.881789	768	1.93	1.47	230.9	5.79	205.882	137.43	10.4631	59			1.29	2	1	0	1
1	27	1	1	0	1	3	3	0	3	1	1	1	1	0	1	1	79	19.15	94	149	83	66.73	7.61905	5.45	75.1	14.3	114	2.8	1.14749	507.5	2.11	1.07	234.6	3.67	83.871	150.039	10.04	54			1.31	1	1	1	1
1	15	1	1	0	1	3	4	0	1	0	0	0	1	1	0	0	83	17.63	78	167	73	61.35	12.037	13.74	78.7	10	74	15.64	1.03116	876	1.84	2.79	219.2	4.05	239.241	99.9076	10.4631	65			1.06	4	1	0	1
1	11	1	1	0	1	3	4	0	0	1	1	1	1	1	1	0	63	22.94	87	126	89	68.02	9.80392	13.27	86.4	8.6	56	1.35	1.73077	744.1	2.23	1.01	436.3	2.61	254.688	109.064	10.0579	62			1.36	1	1	1	1
1	9	1	1	0	1	3	3	0	3	1	0	0	1	1	0	0	71	20.02	78	200	92	63.54	10.1138	10.38	78.7	10.4	84	5.48	1.10749	871	2.02	1.22	235.1	3.28	518.667	114.833	10.4631	63			1.21	1	0	1	1
1	21	1	1	0	1	3	4	0	3	1	0	1	0	1	1	0	61	19.69	107	173	82	63.98	15.4827	8.33	83.4	7.5	87	24.49	1.625	1344.5	2.22	3.73	248.3	3.08	104.808	122.331	10.4631	45			1.17	2	1	0	1
1	8	1	0	0	1	2	4	0	0	0	1	1	0	0	1	0	54	16.02	81	135	74	64.43	10.625	7.7	89.1	7.8	105	4.7	0.979167	488	1.96	2.86	796.8	3.93	114.744	158.118	10.4631	65			1.29	4	0	0	1
