# Supplementary material for: Development and external validation of a multivariate model for predicting pneumonia in patients receiving maintenance hemodialysis: a retrospective study
Source: PeerJ. 2025 Oct 9;13:e20070. doi: 10.7717/peerj.20070 (PMC12515429; doi:10.7717/peerj.20070)
Supplement: Supplemental Information 2 [file peerj-13-20070-s002.xlsx]

## Sheet: Sheet1
column number	variable name
1	center
	0	Modeling set
	1	External validation set
2	time	months
3	Y	pneumonia
	0	no
	1	yes
4	Sex
	0	famale
	1	male
5	Smoking or drinking
	0	no
	1	yes
6	Hemodialysis vascular access
	1	autogenous arteriovenous fistula
	2	long-term cuff catheter
7	Dialysis frequency（weekly)
	2	＜3
	3	≥3
8	Duration of dialysis
9	Cerebralapoplexy
	0	no
	1	yes
10	Hypertension
	0	no
	1	grade 1~2
	3	grade 3
11	Diabetes
	0	no
	1	yes
12	CHD
	0	no
	1	yes
13	NYHA
	0	0~2
	1	3~4
14	Metabolic acidosis
	0	no
	1	yes
15	Pulmonary artery hypertension
	0	no
	1	yes
16	Serous effusio
	0	no
	1	yes
17	History of fracture surgery
	0	no
	1	yes
18	Age	years
19	BMI
20	Pulse	bpm
21	SBP	mmHg
22	DBP	mmHg
23	URR	%
24	UFR	ml/kg*h
25	WBC	10^9/L
26	NEU_	NEU%
27	LYM_	LYM%
28	HGB	g/L
29	CRP	mg/L
30	A_G	A/G
31	Scr	μmol/L
32	Ca	mmol/L
33	P	mmol/L
34	PTH	pmol/L
35	TC	mmol/L
36	PHR	10^9 mmol/L^2
37	LVMI	g/m²
38	ln（NT-proBNP）	pg/mL
39	LVEF	%
40	Kt_V	spKt/V:single-pool Kt/V
41	Reasons for entering dialysis
	1	Diabetes
	2	Nephritis
	3	Hypertension
	4	Others(Lupus nephritis、Polycystic kidney)
42	Antihypertensive drugs
	0	no
	1	yes
43	Antidiabetic drugs	Oral hypoglycemic drugs or insulin
	0	no
	1	yes
44	Calcium tablets or Vitamin D
	0	no
	1	yes
Note: CHD,Coronary-heart-disease; BMI, body mass index; SBP, systolic blood pressure; DBP, Diastolic blood pressure; URR, urea reduction ratio; UFR, ultrafiltration rate; WBC, white blood cell; NEU%, neutrophil ratio; LYM%, lymphocyte ratio; HGB, hemoglobin; CRP, C-reactive protein; A/G, albumin-globulin ratio; Scr, Serum creatinine; Ca, serum calcium P, serum phosphorus; PTH, Parathyroid hormone…
